# Supplementary material
Source: PubMed Central journal article supplement (PMC4457545)
Supplement: NIHMS680152-supplement-1.pdf [file NIHMS680152-supplement-1.pdf]

# Supplemental Figure A

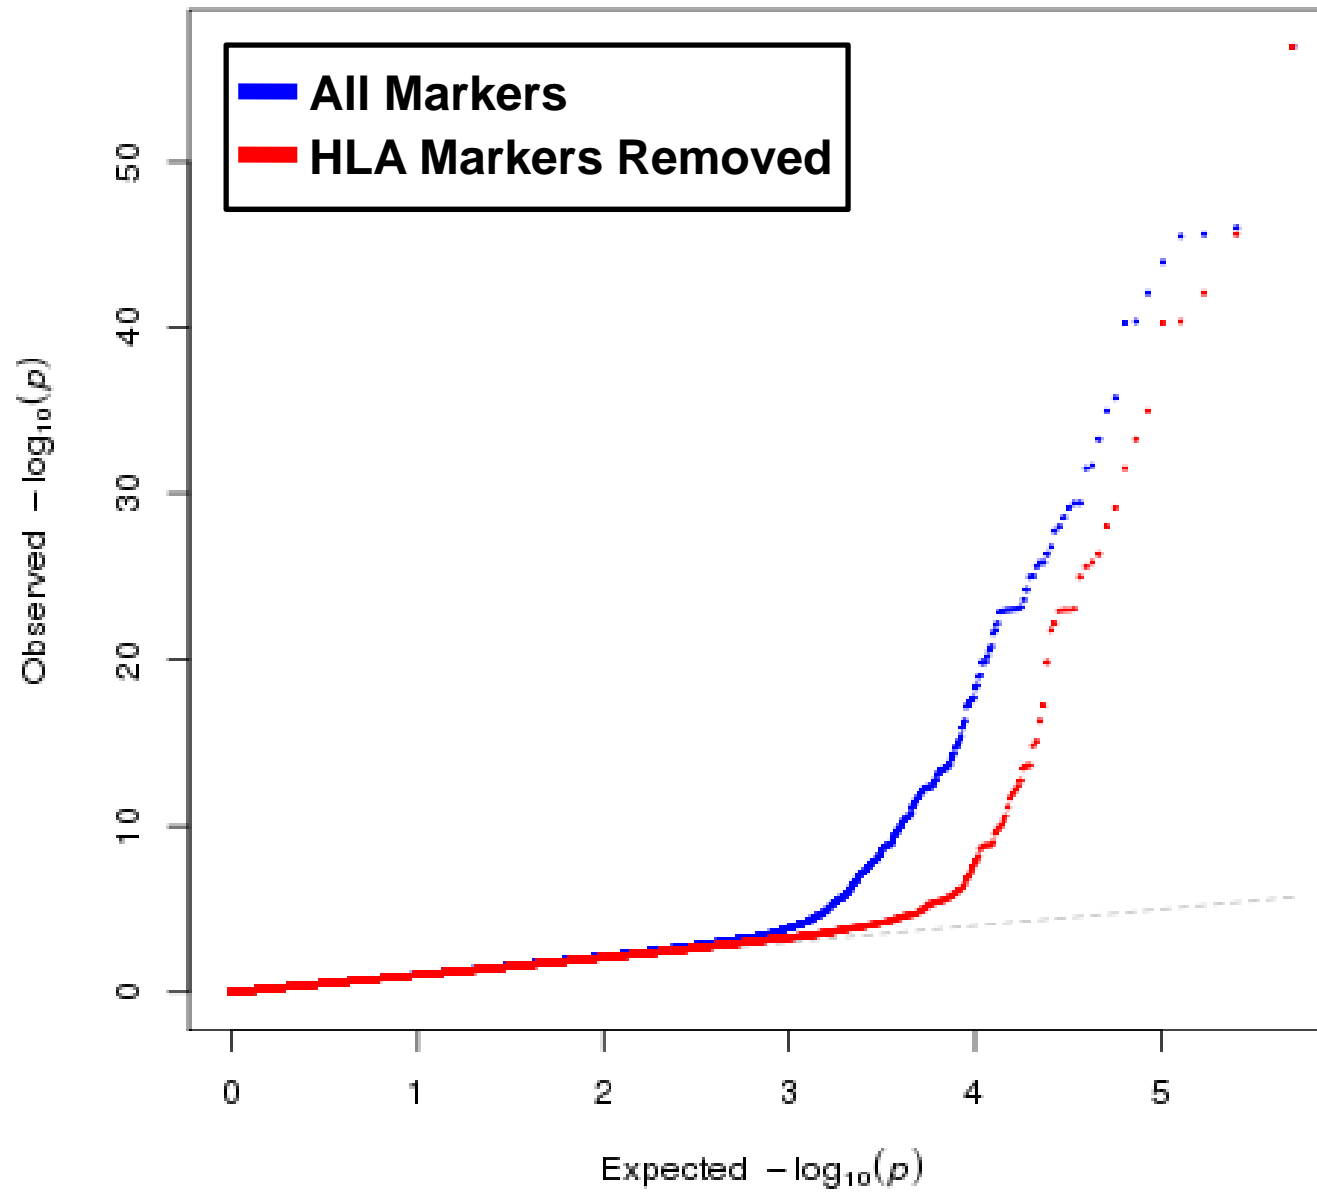

**Supplemental Table A: Genes selected for analysis in the replication set**

| <b>Gene Symbol</b> | <b>Chromosome</b> | <b>No of Tested SNPs</b> |
|--------------------|-------------------|--------------------------|
| ADAMTS9            | 3p14              | 3                        |
| BAT2               | 6p21.3            | 4                        |
| BCL2L15            | 1p13.2            | 4                        |
| BTNL2              | 6p21.3            | 14                       |
| CFB                | 6p21.3            | 2                        |
| DDR1               | 6p21.3            | 8                        |
| GPR103             | 4q27              | 3                        |
| HCP5               | 6p21.3            | 14                       |
| HSPA1L             | 6p21.3            | 2                        |
| IER3               | 6p21.3            | 7                        |
| LTA                | 6p21.3            | 4                        |
| MAGI3              | 1p12-11.2         | 7                        |
| MICA               | 6p21.33           | 12                       |
| NCR3               | 6p21.3            | 2                        |
| NFKBIL1            | 6p21.3            | 3                        |
| NOTCH4             | 6p21.3            | 14                       |
| PHTF1              | 1p13              | 2                        |
| PSMB8              | 6p21.3            | 4                        |
| PSORS1C1           | 6p21.3            | 5                        |
| PTPN22             | 1p13.2            | 3                        |
| SC65               | 17q21.2           | 2                        |
| TAP2               | 6p21.3            | 13                       |
| TNXB               | 6p21.3            | 6                        |
| TRIM31             | 6p21.3            | 6                        |

**Supplemental Table B: Analysis of 143 SNPs conditioned and not conditioned on PCA**

| CHR | SNP        | BP        | A1 | TEST | NMISS | P_PCA    | P_no_PCA    |
|-----|------------|-----------|----|------|-------|----------|-------------|
| 1   | rs10858000 | 113877319 | 1  | ADD  | 1115  | 2.05E-05 | 6.171E-07   |
| 1   | rs2153977  | 113881594 | 1  | ADD  | 1115  | 0.000319 | 0.00004177  |
| 1   | rs10858002 | 113884455 | 2  | ADD  | 1115  | 0.000229 | 0.00004403  |
| 1   | rs12074958 | 113896862 | 2  | ADD  | 1115  | 3.46E-05 | 0.00000319  |
| 1   | rs12035317 | 113897620 | 2  | ADD  | 1115  | 3.46E-05 | 0.00000274  |
| 1   | rs1230661  | 113987113 | 1  | ADD  | 1115  | 2.54E-07 | 1.329E-08   |
| 1   | rs4839335  | 114035394 | 2  | ADD  | 1114  | 9.23E-07 | 1.651E-07   |
| 1   | rs1111695  | 114045422 | 2  | ADD  | 1115  | 2.26E-06 | 4.082E-08   |
| 1   | rs1230647  | 114055162 | 2  | ADD  | 1115  | 1.12E-06 | 2.682E-07   |
| 1   | rs2476601  | 114179091 | 1  | ADD  | 1115  | 5.29E-11 | 8.429E-11   |
| 1   | rs1217407  | 114195271 | 1  | ADD  | 1115  | 5.46E-07 | 1.909E-07   |
| 1   | rs1217418  | 114202754 | 1  | ADD  | 1113  | 1.52E-06 | 1.101E-07   |
| 1   | rs6665194  | 114219366 | 1  | ADD  | 1114  | 1.30E-07 | 1.741E-08   |
| 1   | rs12566340 | 114221851 | 1  | ADD  | 1115  | 2.5E-07  | 2.882E-08   |
| 1   | rs7529353  | 114221985 | 1  | ADD  | 1115  | 1.27E-07 | 8.137E-09   |
| 1   | rs2358994  | 114230984 | 1  | ADD  | 1115  | 1.21E-07 | 2.693E-09   |
| 3   | rs6782866  | 64583706  | 2  | ADD  | 1115  | 1.73E-05 | 0.000001035 |
| 3   | rs11708072 | 64596599  | 2  | ADD  | 1115  | 1.35E-05 | 4.348E-07   |
| 4   | rs10518389 | 122531523 | 2  | ADD  | 1115  | 1.05E-05 | 0.00003035  |
| 4   | rs7679475  | 122533490 | 1  | ADD  | 1114  | 7.04E-08 | 0.000001355 |
| 4   | rs1513695  | 122534235 | 1  | ADD  | 1115  | 1.65E-06 | 0.00003995  |
| 6   | rs7753935  | 30168762  | 1  | ADD  | 1115  | 1.05E-09 | 0.000000336 |
| 6   | rs7765810  | 30171475  | 1  | ADD  | 1114  | 4.35E-09 | 5.182E-07   |
| 6   | rs2844795  | 30181826  | 2  | ADD  | 1115  | 7.95E-07 | 0.000001187 |
| 6   | rs2523989  | 30186254  | 1  | ADD  | 1113  | 0.000301 | 0.00006649  |
| 6   | rs2523987  | 30187972  | 2  | ADD  | 1115  | 9.26E-05 | 0.000006788 |
| 6   | rs2517598  | 30188253  | 1  | ADD  | 1115  | 0.000167 | 0.00001458  |
| 6   | rs3095340  | 30834918  | 2  | ADD  | 1115  | 0.000183 | 0.000003086 |
| 6   | rs12210947 | 30843084  | 2  | ADD  | 1112  | 3.10E-06 | 0.000009933 |
| 6   | rs13201769 | 30864045  | 1  | ADD  | 1115  | 4.67E-06 | 0.000004346 |
| 6   | rs4713366  | 30864340  | 1  | ADD  | 1107  | 2.89E-06 | 0.000002863 |
| 6   | rs3131063  | 30871735  | 1  | ADD  | 1115  | 1.01E-06 | 3.357E-07   |
| 6   | rs12190167 | 30874173  | 1  | ADD  | 1115  | 1.61E-07 | 5.007E-07   |
| 6   | rs886424   | 30889981  | 1  | ADD  | 1114  | 8.82E-07 | 2.86E-08    |
| 6   | rs12192704 | 30900249  | 1  | ADD  | 1115  | 4.22E-07 | 2.568E-07   |
| 6   | rs915664   | 30902596  | 2  | ADD  | 1115  | 0.000318 | 0.00001175  |
| 6   | rs1264350  | 30904524  | 2  | ADD  | 1115  | 2.00E-05 | 0.000000712 |
| 6   | rs12198723 | 30904713  | 2  | ADD  | 1093  | 2.71E-08 | 6.606E-08   |
| 6   | rs3095352  | 30913900  | 2  | ADD  | 1109  | 0.000148 | 0.0005073   |
| 6   | rs3130653  | 30930750  | 2  | ADD  | 1114  | 0.000225 | 0.0008318   |
| 6   | rs2844659  | 30932511  | 1  | ADD  | 1108  | 4.34E-05 | 0.00006793  |
| 6   | rs2844657  | 30937501  | 2  | ADD  | 1105  | 3.55E-05 | 0.00006303  |
| 6   | rs2844670  | 31113705  | 2  | ADD  | 1115  | 2.97E-05 | 0.00004112  |
| 6   | rs3823418  | 31208921  | 1  | ADD  | 1115  | 0.000199 | 0.00003083  |
| 6   | rs3130564  | 31209653  | 1  | ADD  | 1113  | 4.42E-05 | 0.000004907 |

| CHR | SNP        | BP       | A1 | TEST | NMISS | P_PCA    | P_no_PCA    |
|-----|------------|----------|----|------|-------|----------|-------------|
| 6   | rs1265099  | 31213392 | 2  | ADD  | 1114  | 1.82E-09 | 6.58E-10    |
| 6   | rs1265098  | 31214156 | 2  | ADD  | 1115  | 3.62E-07 | 7.215E-08   |
| 6   | rs2844533  | 31458781 | 2  | ADD  | 1115  | 3.59E-07 | 5.888E-08   |
| 6   | rs2442749  | 31460019 | 2  | ADD  | 1115  | 1.43E-07 | 1.269E-09   |
| 6   | rs2844529  | 31461572 | 1  | ADD  | 1115  | 4.65E-05 | 0.0004418   |
| 6   | rs2428486  | 31462083 | 2  | ADD  | 1113  | 4.45E-05 | 0.0004602   |
| 6   | rs2596560  | 31463297 | 2  | ADD  | 1111  | 1.34E-11 | 3.456E-13   |
| 6   | rs2523467  | 31470909 | 1  | ADD  | 1113  | 8.32E-05 | 0.0002887   |
| 6   | rs2251396  | 31472686 | 1  | ADD  | 1115  | 2.20E-10 | 1.477E-09   |
| 6   | rs2596542  | 31474574 | 1  | ADD  | 1113  | 6.27E-05 | 0.0001906   |
| 6   | rs2523454  | 31475844 | 1  | ADD  | 1115  | 8.93E-10 | 8.094E-11   |
| 6   | rs2256175  | 31488428 | 1  | ADD  | 1113  | 8.07E-06 | 0.00000709  |
| 6   | rs2844513  | 31496193 | 1  | ADD  | 1113  | 6.35E-05 | 0.00009313  |
| 6   | rs2524279  | 31500885 | 2  | ADD  | 1114  | 8.52E-07 | 0.00002276  |
| 6   | rs2596464  | 31520940 | 1  | ADD  | 1108  | 0.000273 | 0.00006533  |
| 6   | rs3128982  | 31525170 | 2  | ADD  | 1114  | 0.000234 | 0.00006582  |
| 6   | rs2596472  | 31536946 | 2  | ADD  | 1092  | 3.48E-09 | 1.923E-10   |
| 6   | rs2244839  | 31546347 | 1  | ADD  | 1112  | 3.77E-05 | 0.00001234  |
| 6   | rs2844505  | 31547042 | 2  | ADD  | 1112  | 0.000136 | 0.0000102   |
| 6   | rs1055569  | 31548061 | 1  | ADD  | 1115  | 0.000107 | 0.0001379   |
| 6   | rs2516440  | 31548476 | 1  | ADD  | 1115  | 7.10E-05 | 0.00007992  |
| 6   | rs2395488  | 31553888 | 2  | ADD  | 1112  | 3.69E-13 | 6.648E-13   |
| 6   | rs2248372  | 31554445 | 1  | ADD  | 1112  | 1.02E-05 | 0.00002335  |
| 6   | rs2516513  | 31555567 | 1  | ADD  | 1115  | 0.000317 | 0.0003767   |
| 6   | rs2516424  | 31556294 | 2  | ADD  | 1104  | 3.36E-13 | 4.583E-13   |
| 6   | rs2248617  | 31556512 | 1  | ADD  | 1115  | 4.15E-13 | 5.505E-13   |
| 6   | rs3099844  | 31556955 | 1  | ADD  | 1113  | 2.36E-09 | 1.785E-11   |
| 6   | rs2905722  | 31557306 | 1  | ADD  | 1115  | 3.02E-07 | 4.445E-08   |
| 6   | rs2071591  | 31623778 | 1  | ADD  | 1096  | 2.98E-06 | 0.000003926 |
| 6   | rs2516390  | 31637862 | 2  | ADD  | 1115  | 9.58E-11 | 1.27E-10    |
| 6   | rs928815   | 31639194 | 1  | ADD  | 1115  | 9.58E-11 | 1.448E-10   |
| 6   | rs2857708  | 31641585 | 1  | ADD  | 1097  | 2.80E-05 | 0.000157    |
| 6   | rs2844484  | 31644203 | 1  | ADD  | 1113  | 8.98E-11 | 1.177E-10   |
| 6   | rs2844482  | 31647746 | 1  | ADD  | 1111  | 0.000312 | 0.004137    |
| 6   | rs1041981  | 31648763 | 1  | ADD  | 1115  | 6.72E-06 | 0.000003859 |
| 6   | rs2857596  | 31675401 | 2  | ADD  | 1077  | 6.91E-09 | 8.712E-09   |
| 6   | rs2857595  | 31676448 | 1  | ADD  | 1115  | 1.43E-06 | 5.078E-08   |
| 6   | rs2242660  | 31705732 | 1  | ADD  | 1088  | 5.08E-11 | 1.251E-14   |
| 6   | rs3115663  | 31709822 | 2  | ADD  | 1115  | 1.64E-10 | 1.201E-12   |
| 6   | rs1046089  | 31710946 | 1  | ADD  | 1115  | 2.39E-13 | 3.425E-16   |
| 6   | rs3132453  | 31712023 | 1  | ADD  | 1112  | 9.34E-05 | 0.00001137  |
| 6   | rs2075800  | 31885925 | 1  | ADD  | 1109  | 0.000164 | 0.001685    |
| 6   | rs2227956  | 31886251 | 2  | ADD  | 1115  | 1.20E-15 | 7.449E-17   |
| 6   | rs1270942  | 32026839 | 2  | ADD  | 1114  | 7.53E-11 | 1.39E-12    |
| 6   | rs4151672  | 32027809 | 1  | ADD  | 1112  | 5.97E-05 | 0.003324    |
| 6   | rs12198173 | 32134786 | 1  | ADD  | 1115  | 2.74E-08 | 5.215E-09   |

| CHR | SNP        | BP       | A1 | TEST | NMISS | P_PCA    | P_no_PCA    |
|-----|------------|----------|----|------|-------|----------|-------------|
| 6   | rs1150754  | 32158736 | 1  | ADD  | 1112  | 3.21E-15 | 4.103E-15   |
| 6   | rs1150752  | 32172704 | 2  | ADD  | 1103  | 1.51E-13 | 1.057E-15   |
| 6   | rs13199524 | 32174743 | 1  | ADD  | 1115  | 3.97E-08 | 8.099E-09   |
| 6   | rs3134954  | 32179871 | 2  | ADD  | 1115  | 1.11E-12 | 1.791E-13   |
| 6   | rs12153855 | 32182782 | 2  | ADD  | 1115  | 3.71E-09 | 7.668E-10   |
| 6   | rs3131296  | 32280971 | 1  | ADD  | 1104  | 2.22E-08 | 4.1E-09     |
| 6   | rs3134798  | 32292683 | 2  | ADD  | 1112  | 0.000114 | 0.0003933   |
| 6   | rs8192585  | 32296801 | 1  | ADD  | 1114  | 2.75E-05 | 0.001086    |
| 6   | rs3132946  | 32298006 | 1  | ADD  | 1115  | 2.36E-11 | 3.416E-12   |
| 6   | rs434841   | 32299019 | 1  | ADD  | 1106  | 7.19E-15 | 1.806E-13   |
| 6   | rs3830041  | 32299317 | 1  | ADD  | 1114  | 3.19E-09 | 5.293E-09   |
| 6   | rs2267644  | 32300538 | 1  | ADD  | 1113  | 1.29E-05 | 0.0001385   |
| 6   | rs377763   | 32307122 | 1  | ADD  | 1115  | 1.02E-06 | 5.421E-09   |
| 6   | rs3130299  | 32311515 | 2  | ADD  | 1115  | 9.47E-07 | 1.672E-08   |
| 6   | rs405875   | 32323166 | 2  | ADD  | 1115  | 8.05E-07 | 5.689E-08   |
| 6   | rs3115573  | 32326821 | 2  | ADD  | 1115  | 1.43E-06 | 4.729E-07   |
| 6   | rs9267992  | 32328375 | 2  | ADD  | 1115  | 1.84E-13 | 2.412E-14   |
| 6   | rs3130315  | 32328663 | 1  | ADD  | 1115  | 1.43E-06 | 6.011E-07   |
| 6   | rs9268005  | 32332366 | 2  | ADD  | 1098  | 1.04E-18 | 4.226E-21   |
| 6   | rs4424066  | 32462406 | 2  | ADD  | 1115  | 1.60E-06 | 0.000001383 |
| 6   | rs3117098  | 32466491 | 2  | ADD  | 1115  | 1.67E-14 | 3.209E-14   |
| 6   | rs3817973  | 32469089 | 1  | ADD  | 1114  | 1.60E-06 | 0.000001782 |
| 6   | rs1980493  | 32471193 | 2  | ADD  | 1111  | 6.99E-11 | 4.609E-11   |
| 6   | rs4248166  | 32474399 | 2  | ADD  | 1112  | 4.5E-06  | 3.267E-07   |
| 6   | rs2294884  | 32475237 | 2  | ADD  | 1115  | 2.28E-06 | 1.327E-07   |
| 6   | rs3817963  | 32476065 | 2  | ADD  | 1115  | 8.48E-17 | 4.301E-19   |
| 6   | rs3806156  | 32481676 | 1  | ADD  | 1115  | 1.01E-11 | 8.418E-13   |
| 6   | rs3763309  | 32483951 | 1  | ADD  | 1115  | 9.88E-29 | 3.908E-31   |
| 6   | rs3763312  | 32484326 | 1  | ADD  | 1110  | 5.83E-29 | 2.093E-31   |
| 6   | rs3129963  | 32488186 | 2  | ADD  | 1113  | 7.21E-08 | 1.137E-07   |
| 6   | rs9268528  | 32491086 | 2  | ADD  | 1113  | 1.37E-19 | 3.429E-22   |
| 6   | rs9268542  | 32492699 | 2  | ADD  | 1115  | 4.19E-19 | 7.251E-22   |
| 6   | rs2395163  | 32495787 | 2  | ADD  | 1115  | 8.60E-31 | 2.114E-32   |
| 6   | rs2857106  | 32895548 | 2  | ADD  | 1114  | 2.35E-09 | 1.474E-09   |
| 6   | rs9784758  | 32896489 | 2  | ADD  | 1115  | 2.05E-09 | 4.916E-08   |
| 6   | rs10484565 | 32903010 | 1  | ADD  | 1113  | 2.68E-06 | 0.000005242 |
| 6   | rs241453   | 32904204 | 1  | ADD  | 1114  | 6.50E-15 | 3.895E-15   |
| 6   | rs241447   | 32904729 | 2  | ADD  | 1101  | 2.58E-15 | 1.064E-15   |
| 6   | rs241440   | 32905339 | 1  | ADD  | 1115  | 3.71E-15 | 2.249E-15   |
| 6   | rs241437   | 32905662 | 2  | ADD  | 1114  | 0.000376 | 0.0009035   |
| 6   | rs241436   | 32905854 | 2  | ADD  | 1105  | 1.54E-05 | 0.00005102  |
| 6   | rs1015166  | 32906709 | 1  | ADD  | 1115  | 1.23E-11 | 7.265E-11   |
| 6   | rs2228397  | 32908202 | 1  | ADD  | 1083  | 2.03E-06 | 0.000004935 |
| 6   | rs3819715  | 32912197 | 1  | ADD  | 1115  | 1.07E-06 | 0.00009658  |
| 6   | rs241427   | 32912392 | 1  | ADD  | 1115  | 2.24E-08 | 7.469E-08   |
| 6   | rs241425   | 32912887 | 1  | ADD  | 1115  | 1.04E-14 | 8.014E-17   |

| <b>CHR</b> | <b>SNP</b> | <b>BP</b> | <b>A1</b> | <b>TEST</b> | <b>NMISS</b> | <b>P_PCA</b> | <b>P_no_PCA</b> |
|------------|------------|-----------|-----------|-------------|--------------|--------------|-----------------|
| 6          | rs3763349  | 32916210  | 1         | ADD         | 1115         | 1.58E-07     | 2.316E-07       |
| 6          | rs9357155  | 32917826  | 1         | ADD         | 1107         | 8.34E-08     | 1.193E-07       |
| 6          | rs6924102  | 32919361  | 2         | ADD         | 1115         | 3.43E-07     | 1.191E-07       |
| 6          | rs2071543  | 32919607  | 1         | ADD         | 1115         | 1.19E-06     | 0.000001408     |
| 17         | rs2304493  | 37219694  | 2         | ADD         | 1107         | 2.14E-06     | 0.000001048     |
| 17         | rs13412    | 37220968  | 2         | ADD         | 1115         | 1.33E-06     | 0.000001804     |

**Supplemental Table C1:** Logistic regression analysis of 23 SNPs in the MHC region

| SNP       | CHR | Gene     | p-value:               |                          |
|-----------|-----|----------|------------------------|--------------------------|
|           |     |          | independent SNP effect | marginal omnibus LR test |
| rs2523989 | 6   | TRIM31   | NA                     | --                       |
| rs886424  | 6   | IER3     | NA                     | --                       |
| rs2844657 | 6   | DDR1     | NA                     | --                       |
| rs3130564 | 6   | PSORS1C1 | NA                     | --                       |
| rs2074488 | 6   | HLA-C    | NA                     | --                       |
| rs3134792 | 6   | HLA-B    | NA                     | --                       |
| rs2156875 | 6   | HLA-B    | 0.524                  | 2.45x10 <sup>-50</sup>   |
| rs2251396 | 6   | MICA     | NA                     | --                       |
| rs3099844 | 6   | HCP5     | NA                     | --                       |
| rs2071591 | 6   | NFKBIL1  | NA                     | --                       |
| rs1041981 | 6   | LTA      | NA                     | --                       |
| rs2857595 | 6   | NCR3     | NA                     | --                       |
| rs3115663 | 6   | BAT2     | NA                     | --                       |
| rs2227956 | 6   | HSPA1L   | 0.00227                | 1.72x10 <sup>-42</sup>   |
| rs1270942 | 6   | CFB      | NA                     | --                       |
| rs1150752 | 6   | TNXB     | NA                     | --                       |
| rs3131296 | 6   | NOTCH4   | NA                     | --                       |
| rs1980493 | 6   | BTNL2    | NA                     | --                       |
| rs660895  | 6   | HLA-DRB1 | NA                     | --                       |
| rs2187668 | 6   | HLA-DQA1 | NA                     | --                       |
| rs1063355 | 6   | HLA-DQB1 | 0.129                  | 8.11x10 <sup>-38</sup>   |
| rs9275184 | 6   | HLA-DQB1 | NA                     | --                       |
| rs1015166 | 6   | TAP2     | 0.289                  | 4.28x10 <sup>-45</sup>   |

**Column D:** shows the results of the Conditional Likelihood Ratio (LR) tests that test for an independent effect of each SNP (independent of the haplotypic effects formed by the remaining SNPs)

**Column E:** shows the results of the marginal omnibus significant association controlling for each SNP (i.e. it tests if for SNPs that had independent effects, the remaining SNPs in the haplotype jointly contribute with association information beyond the tested SNP alone)

This analysis was performed using PLINK v1.07

**NA-independent effect cannot be determined**

**Supplemental Table C2:** Logistic regression analysis of 4 SNPs in the 1p locus

| SNP       | CHR | Gene          | p-value:               |                                              |
|-----------|-----|---------------|------------------------|----------------------------------------------|
|           |     |               | independent SNP effect | marginal omnibus LR test controlling for SNP |
| rs2153977 | 1   | MAGI3         | 0.56                   | $3.15 \times 10^{-6}$                        |
| rs1111695 | 1   | PHTF1         | 0.29                   | 0.00025                                      |
| rs2476601 | 1   | <b>PTPN22</b> | <b>0.008</b>           | 0.43                                         |
| rs2358994 | 1   | BCL2L15       | 0.95                   | 0.0039                                       |



**Supplemental Table C3:** Logistic regression analysis of the GPR103 locus on chromosome 4q (in the discovery set)

| <b>Analysis Model</b> | <b>SNP</b> | <b>BP</b> | <b>Alleles (minor/major)</b> | <b>p-value</b>        | <b>OR (95% confidence interval)</b> |
|-----------------------|------------|-----------|------------------------------|-----------------------|-------------------------------------|
| <b>Allelic</b>        | rs1051838  | 122531523 | G/A                          | $2.24 \times 10^{-5}$ | 0.6688 (0.5552 - 0.8055)            |
|                       | rs7679475  | 122533490 | T/G                          | $1.28 \times 10^{-7}$ | 1.651 (1.371 – 1.989)               |
|                       | rs1513695  | 122534235 | A/G                          | $2.40 \times 10^{-6}$ | 1.567 (1.3 – 1.888)                 |
|                       |            |           |                              |                       |                                     |
| <b>Dominant</b>       | rs1051838  | 122531523 | G/A                          | $5.08 \times 10^{-5}$ | 0.5567 (0.4194 – 0.7391)            |
|                       | rs7679475  | 122533490 | T/G                          | $7.80 \times 10^{-5}$ | 1.763 (1.331 – 2.336)               |
|                       | rs1513695  | 122534235 | A/G                          | $2.67 \times 10^{-3}$ | 1.546 (1.163 – 2.054)               |
|                       |            |           |                              |                       |                                     |
| <b>Recessive</b>      | rs1051838  | 122531523 | G/A                          | $4.45 \times 10^{-3}$ | 0.6292 (0.4572 – 0.8658)            |
|                       | rs7679475  | 122533490 | T/G                          | $1.50 \times 10^{-6}$ | 2.216 (1.603 – 3.065)               |
|                       | rs1513695  | 122534235 | A/G                          | $1.16 \times 10^{-6}$ | 2.194 (1.599 – 3.012)               |

**Supplemental Table D1: SNPs showing suggestive evidence of association ( $p \leq 10e-5$ )**

| SNP        | CHR | BP        | strand | observer | A1 | TEST | NMISS | OR     | STAT   | Pvalue   | txStart   | txEnd     | GeneID | Gene Symb |
|------------|-----|-----------|--------|----------|----|------|-------|--------|--------|----------|-----------|-----------|--------|-----------|
| rs1015166  | 6   | 32906709  | +      | C/T      | 1  | ADD  | 1115  | 1.939  | 6.777  | 1.31E-09 | 32897587  | 32914525  | 6891   | TAP2      |
| rs1033500  | 6   | 32415360  | -      | C/T      | 1  | ADD  | 1099  | 2.044  | 7.194  | 2.59E-13 | 32368452  | 32447634  | 10665  | C6orf10   |
| rs1046089  | 6   | 31710946  | +      | A/G      | 1  | ADD  | 1115  | 2.067  | 7.325  | 4.97E-11 | 31696428  | 31713533  | 7916   | BAT2      |
| rs10484565 | 6   | 32903010  | +      | A/G      | 1  | ADD  | 1113  | 2.048  | 4.694  | 7.61E-06 | 32897587  | 32914525  | 6891   | TAP2      |
| rs10484566 | 6   | 32943236  | +      | G/T      | 2  | ADD  | 1115  | 2.268  | 4.638  | 8.86E-06 | 32929915  | 32935606  | 5698   | PSMB9     |
| rs10493321 | 1   | 62545856  | +      | A/G      | 2  | ADD  | 1089  | 1.874  | 5.827  | 2.34E-08 | 62474424  | 62557671  | 163782 | KANK4     |
| rs1053924  | 6   | 32228693  | -      | A/G      | 1  | ADD  | 1115  | 0.5619 | -5.29  | 1.14E-07 | 32229278  | 32239430  | 9374   | PPT2      |
| rs1063355  | 6   | 32735692  | -      | A/C      | 1  | ADD  | 1115  | 0.2295 | -11.48 | 2.62E-29 | 32735634  | 32742444  | 3119   | HLA-DQB1  |
| rs10807113 | 6   | 32830164  | +      | A/C      | 1  | ADD  | 1115  | 0.5507 | -6.212 | 3.82E-08 | 32817140  | 32823199  | 3118   | HLA-DQA2  |
| rs1111695  | 1   | 114045422 | -      | G/T      | 2  | ADD  | 1115  | 1.548  | 4.729  | 4.21E-06 | 114041346 | 114103300 | 10745  | PHTF1     |
| rs11244    | 6   | 32888702  | -      | C/T      | 1  | ADD  | 1112  | 1.996  | 7.109  | 1.68E-11 | 32888517  | 32892803  | 3112   | HLA-DOB   |
| rs1150752  | 6   | 32172704  | -      | A/G      | 2  | ADD  | 1103  | 2.801  | 7.386  | 3.50E-11 | 32116910  | 32185129  | 7148   | TNXB      |
| rs1150754  | 6   | 32158736  | -      | A/G      | 1  | ADD  | 1112  | 2.56   | 7.883  | 8.93E-13 | 32116910  | 32185129  | 7148   | TNXB      |
| rs12153855 | 6   | 32182782  | +      | C/T      | 2  | ADD  | 1115  | 0.238  | -5.897 | 8.59E-09 | 32116910  | 32185129  | 7148   | TNXB      |
| rs1217407  | 1   | 114195271 | +      | A/G      | 1  | ADD  | 1115  | 1.651  | 5.01   | 1.87E-06 | 114157960 | 114215857 | 26191  | PTPN22    |
| rs1217418  | 1   | 114202754 | +      | A/G      | 1  | ADD  | 1113  | 1.556  | 4.809  | 5.05E-06 | 114157960 | 114215857 | 26191  | PTPN22    |
| rs12177980 | 6   | 32794062  | +      | A/G      | 1  | ADD  | 1114  | 0.6056 | -4.988 | 5.30E-06 | 32817140  | 32823199  | 3118   | HLA-DQA2  |
| rs12190167 | 6   | 30874173  | +      | A/G      | 1  | ADD  | 1115  | 1.942  | 5.24   | 1.22E-06 | 30818954  | 30820306  | 8870   | IER3      |
| rs12192704 | 6   | 30900249  | +      | A/G      | 1  | ADD  | 1115  | 1.876  | 5.059  | 3.33E-06 | 30959839  | 30975912  | 780    | DDR1      |
| rs12197154 | 6   | 30874223  | +      | C/T      | 2  | ADD  | 1113  | 1.9    | 5.138  | 2.20E-06 | 30818954  | 30820306  | 8870   | IER3      |
| rs12198173 | 6   | 32134786  | +      | A/G      | 1  | ADD  | 1115  | 0.2312 | -5.558 | 4.35E-08 | 32116910  | 32185129  | 7148   | TNXB      |
| rs12198723 | 6   | 30904713  | +      | G/T      | 2  | ADD  | 1093  | 2.074  | 5.559  | 2.73E-07 | 30959839  | 30975912  | 780    | DDR1      |
| rs12210947 | 6   | 30843084  | +      | A/G      | 2  | ADD  | 1112  | 1.737  | 4.664  | 6.47E-06 | 30818954  | 30820306  | 8870   | IER3      |
| rs1230647  | 1   | 114055162 | -      | A/G      | 2  | ADD  | 1115  | 1.63   | 4.869  | 3.81E-06 | 114041346 | 114103300 | 10745  | PHTF1     |
| rs1230661  | 1   | 113987113 | -      | C/T      | 1  | ADD  | 1115  | 1.697  | 5.154  | 8.49E-07 | 113734997 | 114030068 | 260425 | MAGI3     |
| rs12529049 | 6   | 32465693  | +      | C/T      | 1  | ADD  | 1115  | 0.4507 | -4.797 | 7.80E-07 | 32470490  | 32482878  | 56244  | BTNL2     |
| rs12566340 | 1   | 114221851 | +      | C/T      | 1  | ADD  | 1115  | 1.686  | 5.158  | 1.14E-06 | 114220958 | 114231692 | 440603 | BCL2L15   |
| rs1265099  | 6   | 31213392  | -      | C/T      | 2  | ADD  | 1114  | 1.747  | 6.013  | 1.48E-09 | 31190601  | 31215816  | 170679 | PSORS1C1  |
| rs1265110  | 6   | 31227401  | -      | A/G      | 1  | ADD  | 1115  | 1.994  | 5.122  | 1.08E-05 | 31218194  | 31233994  | 54535  | CCHCR1    |
| rs1265758  | 6   | 32431507  | -      | C/T      | 1  | ADD  | 1109  | 0.3577 | -9.195 | 2.94E-18 | 32368452  | 32447634  | 10665  | C6orf10   |
| rs1265759  | 6   | 32430371  | -      | A/G      | 2  | ADD  | 1115  | 0.335  | -9.728 | 1.42E-20 | 32368452  | 32447634  | 10665  | C6orf10   |
| rs12663103 | 6   | 32269302  | +      | C/T      | 2  | ADD  | 1113  | 0.1999 | -4.513 | 1.17E-05 | 32266520  | 32271278  | 63940  | GPSM3     |

| SNP        | CHR | BP        | strand | observer | A1 | TEST | NMISS | OR     | STAT   | Pvalue   | txStart        | txEnd          | GeneID         | Gene Symb      |
|------------|-----|-----------|--------|----------|----|------|-------|--------|--------|----------|----------------|----------------|----------------|----------------|
| rs1270942  | 6   | 32026839  | -      | C/T      | 2  | ADD  | 1114  | 2.372  | 6.51   | 1.24E-08 | 32021699       | 32027840       | 629            | CFB            |
| rs13199524 | 6   | 32174743  | +      | C/T      | 1  | ADD  | 1115  | 0.2351 | -5.492 | 7.02E-08 | 32116910       | 32185129       | 7148           | TNXB           |
| rs13199787 | 6   | 32813254  | +      | C/T      | 1  | ADD  | 1115  | 0.5785 | -5.403 | 7.48E-07 | 32817140       | 32823199       | 3118           | HLA-DQA2       |
| rs13403098 | 2   | 82943089  | +      | A/G      | 1  | ADD  | 1108  | 1.91   | 5.119  | 5.12E-06 | Intergenic SNP | Intergenic SNP | Intergenic SNP | Intergenic SNP |
| rs13437000 | 6   | 33213042  | +      | C/T      | 2  | ADD  | 1105  | 0.5215 | -4.722 | 2.18E-06 | 33238446       | 33268223       | 1302           | COL11A2        |
| rs1383261  | 6   | 32873429  | -      | A/G      | 1  | ADD  | 1113  | 1.724  | 5.808  | 1.51E-08 | 32888517       | 32892803       | 3112           | HLA-DOB        |
| rs1390266  | 4   | 20987259  | -      | G/T      | 2  | ADD  | 1111  | 2.02   | 5.399  | 3.27E-07 | 20339336       | 21559472       | 80333          | KCNIP4         |
| rs1480380  | 6   | 33021224  | +      | C/T      | 1  | ADD  | 1114  | 2.366  | 5.978  | 5.31E-08 | 33024372       | 33028831       | 3108           | HLA-DMA        |
| rs1521     | 6   | 31458683  | +      | C/T      | 2  | ADD  | 1064  | 0.5628 | -4.811 | 1.16E-07 | 31479349       | 31491069       | 4276           | MICA           |
| rs154978   | 6   | 33007274  | -      | A/G      | 2  | ADD  | 1115  | 0.4847 | -7.261 | 4.87E-12 | 33010392       | 33016795       | 3109           | HLA-DMB        |
| rs154981   | 6   | 32988971  | -      | A/G      | 2  | ADD  | 1109  | 0.4651 | -7.619 | 4.84E-13 | 33010392       | 33016795       | 3109           | HLA-DMB        |
| rs1573649  | 6   | 32839236  | -      | C/T      | 1  | ADD  | 1110  | 0.5781 | -5.778 | 2.27E-07 | 32817140       | 32823199       | 3118           | HLA-DQA2       |
| rs16898264 | 6   | 32785130  | +      | A/G      | 1  | ADD  | 1110  | 0.4075 | -8.023 | 3.09E-14 | 32817140       | 32823199       | 3118           | HLA-DQA2       |
| rs16908361 | 12  | 12754119  | +      | C/T      | 1  | ADD  | 1100  | 1738   | 7.375  | 6.38E-13 | 12761575       | 12766570       | 1027           | CDKN1B         |
| rs17087141 | 18  | 69036707  | +      | C/T      | 2  | ADD  | 1114  | 6.388  | 4.816  | 1.54E-06 | Intergenic SNP | Intergenic SNP | Intergenic SNP | Intergenic SNP |
| rs17100060 | 12  | 62739380  | +      | A/G      | 2  | ADD  | 1110  | 3.472  | 11.44  | 9.01E-29 | 62524807       | 62823829       | 57522          | SRGAP1         |
| rs17231696 | 8   | 25731198  | +      | C/T      | 1  | ADD  | 1101  | 1.969  | 4.744  | 8.44E-06 | 25757489       | 25958309       | 64641          | EBF2           |
| rs17475879 | 6   | 30472487  | +      | C/T      | 1  | ADD  | 1115  | 0.3233 | -4.659 | 1.48E-06 | 30565249       | 30569072       | 3133           | HLA-E          |
| rs17500468 | 6   | 32819156  | +      | A/G      | 2  | ADD  | 1110  | 0.4275 | -4.751 | 3.06E-06 | 32817140       | 32823199       | 3118           | HLA-DQA2       |
| rs17533090 | 6   | 32698700  | +      | G/T      | 1  | ADD  | 1115  | 0.3505 | -6.277 | 1.06E-09 | 32713160       | 32719407       | 3117           | HLA-DQA1       |
| rs17641748 | 5   | 147380348 | +      | A/G      | 1  | ADD  | 1102  | 3.68   | 10.93  | 1.36E-26 | 147423727      | 147497118      | 11005          | SPINK5         |
| rs17679624 | 6   | 123688113 | +      | A/C      | 1  | ADD  | 1088  | 0.1675 | -4.823 | 2.39E-06 | 123579181      | 123999641      | 10345          | TRDN           |
| rs1794282  | 6   | 32774504  | -      | A/G      | 1  | ADD  | 1115  | 2.792  | 7.538  | 3.39E-11 | 32735634       | 32742444       | 3119           | HLA-DQB1       |
| rs1894406  | 6   | 32895034  | -      | A/G      | 1  | ADD  | 1112  | 0.4237 | -7.349 | 1.99E-12 | 32888517       | 32892803       | 3112           | HLA-DOB        |
| rs1927906  | 9   | 119519936 | -      | A/G      | 2  | ADD  | 1104  | 2.018  | 5.238  | 3.59E-06 | 119506430      | 119519587      | 7099           | TLR4           |
| rs1980493  | 6   | 32471193  | -      | A/G      | 2  | ADD  | 1111  | 2.242  | 6.521  | 1.30E-08 | 32470490       | 32482878       | 56244          | BTNL2          |
| rs1991914  | 4   | 4260014   | -      | G/T      | 2  | ADD  | 1099  | 0.4398 | -7.185 | 6.27E-12 | 4241430        | 4279522        | 133060         | OTOP1          |
| rs2051549  | 6   | 32838064  | -      | C/T      | 2  | ADD  | 1096  | 1.955  | 7.056  | 1.37E-10 | 32817140       | 32823199       | 3118           | HLA-DQA2       |
| rs2066363  | 1   | 82010165  | -      | A/G      | 2  | ADD  | 1106  | 0.2471 | -10.51 | 6.17E-23 | 82038669       | 82230695       | 23266          | LPHN2          |
| rs2071469  | 6   | 32892761  | -      | A/G      | 1  | ADD  | 1114  | 0.4823 | -6.672 | 1.59E-10 | 32888517       | 32892803       | 3112           | HLA-DOB        |
| rs2071472  | 6   | 32892598  | -      | A/G      | 1  | ADD  | 1115  | 0.434  | -6.86  | 2.67E-11 | 32888517       | 32892803       | 3112           | HLA-DOB        |
| rs2071474  | 6   | 32890560  | -      | A/G      | 1  | ADD  | 1115  | 0.434  | -6.86  | 2.67E-11 | 32888517       | 32892803       | 3112           | HLA-DOB        |
| rs2071538  | 6   | 32926656  | -      | C/T      | 1  | ADD  | 1115  | 0.5063 | -5.195 | 2.37E-07 | 32920963       | 32929726       | 6890           | TAP1           |
| rs2071540  | 6   | 32920894  | -      | A/G      | 1  | ADD  | 1115  | 0.5077 | -6.508 | 9.81E-11 | 32920963       | 32929726       | 6890           | TAP1           |

| SNP       | CHR | BP        | strand | observer | A1 | TEST | NMISS | OR     | STAT   | Pvalue   | txStart   | txEnd     | GeneID | Gene Symb |
|-----------|-----|-----------|--------|----------|----|------|-------|--------|--------|----------|-----------|-----------|--------|-----------|
| rs2071543 | 6   | 32919607  | -      | A/C      | 1  | ADD  | 1115  | 1.853  | 4.857  | 7.11E-06 | 32916471  | 32920690  | 5696   | PSMB8     |
| rs2071550 | 6   | 32838918  | -      | G/T      | 1  | ADD  | 1115  | 0.4398 | -7.015 | 2.64E-11 | 32817140  | 32823199  | 3118   | HLA-DQA2  |
| rs2071554 | 6   | 32892654  | -      | A/G      | 1  | ADD  | 1115  | 3.414  | 6.556  | 1.53E-09 | 32888517  | 32892803  | 3112   | HLA-DOB   |
| rs2074488 | 6   | 31348410  | -      | A/C      | 1  | ADD  | 1115  | 2.348  | 6.431  | 5.91E-08 | 31344507  | 31347834  | 3107   | HLA-C     |
| rs2156875 | 6   | 31425326  | -      | A/G      | 2  | ADD  | 1115  | 0.5783 | -5.667 | 2.00E-08 | 31429627  | 31432968  | 3106   | HLA-B     |
| rs2187668 | 6   | 32713862  | -      | A/G      | 1  | ADD  | 1112  | 3.031  | 8.801  | 5.74E-16 | 32713160  | 32719407  | 3117   | HLA-DQA1  |
| rs2219893 | 6   | 32877641  | -      | A/G      | 2  | ADD  | 1098  | 0.4491 | -6.833 | 2.34E-11 | 32888517  | 32892803  | 3112   | HLA-DOB   |
| rs2227956 | 6   | 31886251  | -      | C/T      | 2  | ADD  | 1115  | 0.1981 | -8.004 | 7.18E-17 | 31885374  | 31890814  | 3305   | HSPA1L    |
| rs2228397 | 6   | 32908202  | -      | G/T      | 1  | ADD  | 1083  | 0.5467 | -4.75  | 5.65E-06 | 32897587  | 32914525  | 6891   | TAP2      |
| rs2239800 | 6   | 32821245  | -      | C/T      | 2  | ADD  | 1115  | 0.3669 | -4.736 | 1.31E-05 | 32817140  | 32823199  | 3118   | HLA-DQA2  |
| rs2239804 | 6   | 32519501  | -      | A/G      | 1  | ADD  | 1114  | 0.4909 | -6.978 | 6.42E-14 | 32515624  | 32520802  | 3122   | HLA-DRA   |
| rs2242660 | 6   | 31705732  | -      | C/T      | 1  | ADD  | 1088  | 1.89   | 6.569  | 1.03E-09 | 31696428  | 31713533  | 7916   | BAT2      |
| rs2246618 | 6   | 31586965  | +      | C/T      | 1  | ADD  | 1071  | 1.964  | 7.179  | 8.38E-13 | 31573833  | 31586880  | 4277   | MICB      |
| rs2248617 | 6   | 31556512  | -      | A/G      | 1  | ADD  | 1115  | 1.959  | 7.25   | 4.14E-13 | 31538937  | 31541461  | 10866  | HCP5      |
| rs2251396 | 6   | 31472686  | -      | C/T      | 1  | ADD  | 1115  | 1.882  | 6.347  | 5.76E-08 | 31479349  | 31491069  | 4276   | MICA      |
| rs2253907 | 6   | 31444849  | -      | A/G      | 2  | ADD  | 1108  | 0.585  | -5.741 | 7.42E-08 | 31429627  | 31432968  | 3106   | HLA-B     |
| rs2254556 | 6   | 31450610  | -      | A/G      | 1  | ADD  | 1115  | 0.4783 | -4.857 | 1.23E-07 | 31429627  | 31432968  | 3106   | HLA-B     |
| rs2256965 | 6   | 31663109  | -      | A/C/T    | 1  | ADD  | 1114  | 0.576  | -5.46  | 1.26E-06 | 31661949  | 31664665  | 7940   | LST1      |
| rs2269127 | 21  | 42950306  | +      | A/G      | 1  | ADD  | 1087  | 4.771  | 12.91  | 1.01E-35 | 42946930  | 43068687  | 5152   | PDE9A     |
| rs2294884 | 6   | 32475237  | -      | A/C      | 2  | ADD  | 1115  | 0.4954 | -4.727 | 1.03E-06 | 32470490  | 32482878  | 56244  | BTNL2     |
| rs2301271 | 6   | 32833171  | -      | C/T      | 1  | ADD  | 1115  | 1.976  | 7.125  | 8.09E-11 | 32817140  | 32823199  | 3118   | HLA-DQA2  |
| rs2358994 | 1   | 114230984 | +      | A/G      | 1  | ADD  | 1115  | 1.823  | 5.292  | 1.70E-06 | 114220958 | 114231692 | 440603 | BCL2L15   |
| rs2395150 | 6   | 32434023  | +      | A/G      | 2  | ADD  | 1115  | 0.3501 | -9.394 | 5.32E-19 | 32368452  | 32447634  | 10665  | C6orf10   |
| rs2395157 | 6   | 32456123  | +      | A/G      | 2  | ADD  | 1111  | 2.457  | 8.616  | 7.31E-16 | 32368452  | 32447634  | 10665  | C6orf10   |
| rs2395162 | 6   | 32495758  | +      | G/T      | 1  | ADD  | 1111  | 2.103  | 6.023  | 3.66E-07 | 32470490  | 32482878  | 56244  | BTNL2     |
| rs2395163 | 6   | 32495787  | +      | C/T      | 2  | ADD  | 1115  | 4.019  | 11.54  | 1.72E-28 | 32470490  | 32482878  | 56244  | BTNL2     |
| rs2395173 | 6   | 32512837  | +      | A/G      | 1  | ADD  | 1115  | 0.1979 | -10.95 | 1.66E-27 | 32515624  | 32520802  | 3122   | HLA-DRA   |
| rs2395175 | 6   | 32513004  | +      | A/G      | 1  | ADD  | 1115  | 5.007  | 12.38  | 3.91E-30 | 32515624  | 32520802  | 3122   | HLA-DRA   |
| rs2395182 | 6   | 32521295  | +      | G/T      | 2  | ADD  | 1111  | 0.1799 | -8.773 | 1.96E-18 | 32515624  | 32520802  | 3122   | HLA-DRA   |
| rs2395185 | 6   | 32541145  | +      | G/T      | 1  | ADD  | 1113  | 2.565  | 8.907  | 5.35E-18 | 32515624  | 32520802  | 3122   | HLA-DRA   |
| rs2395488 | 6   | 31553888  | +      | A/G      | 2  | ADD  | 1112  | 1.961  | 7.266  | 3.69E-13 | 31538937  | 31541461  | 10866  | HCP5      |
| rs241404  | 6   | 32973975  | -      | A/G      | 2  | ADD  | 1115  | 1.608  | 5.041  | 1.83E-06 | 33010392  | 33016795  | 3109   | HLA-DMB   |
| rs241407  | 6   | 32970718  | -      | A/G      | 1  | ADD  | 1115  | 2.245  | 5.969  | 5.64E-09 | 32929915  | 32935606  | 5698   | PSMB9     |
| rs241409  | 6   | 32969898  | -      | C/T      | 2  | ADD  | 1115  | 2.186  | 5.784  | 1.06E-08 | 32929915  | 32935606  | 5698   | PSMB9     |

| SNP       | CHR | BP        | strand | observer | A1 | TEST | NMISS | OR     | STAT   | Pvalue   | txStart        | txEnd          | GeneID         | Gene Symb      |
|-----------|-----|-----------|--------|----------|----|------|-------|--------|--------|----------|----------------|----------------|----------------|----------------|
| rs241424  | 6   | 32912912  | -      | C/T      | 1  | ADD  | 1115  | 1.631  | 5.196  | 1.83E-07 | 32897587       | 32914525       | 6891           | TAP2           |
| rs241425  | 6   | 32912887  | -      | C/T      | 1  | ADD  | 1115  | 0.4414 | -7.734 | 4.34E-15 | 32897587       | 32914525       | 6891           | TAP2           |
| rs241427  | 6   | 32912392  | -      | C/T      | 1  | ADD  | 1115  | 0.5359 | -5.593 | 5.13E-09 | 32897587       | 32914525       | 6891           | TAP2           |
| rs241440  | 6   | 32905339  | -      | A/G      | 1  | ADD  | 1115  | 0.3378 | -7.864 | 4.84E-14 | 32897587       | 32914525       | 6891           | TAP2           |
| rs241447  | 6   | 32904729  | -      | A/G      | 2  | ADD  | 1101  | 0.3386 | -7.91  | 3.60E-14 | 32897587       | 32914525       | 6891           | TAP2           |
| rs241448  | 6   | 32904663  | -      | C/T      | 2  | ADD  | 1104  | 0.3625 | -7.498 | 7.19E-13 | 32897587       | 32914525       | 6891           | TAP2           |
| rs241452  | 6   | 32904324  | -      | A/G      | 2  | ADD  | 1109  | 0.3528 | -7.623 | 2.99E-13 | 32897587       | 32914525       | 6891           | TAP2           |
| rs241453  | 6   | 32904204  | -      | C/T      | 1  | ADD  | 1114  | 0.3431 | -7.794 | 7.63E-14 | 32897587       | 32914525       | 6891           | TAP2           |
| rs2442749 | 6   | 31460019  | -      | A/G      | 2  | ADD  | 1115  | 1.667  | 5.262  | 5.76E-08 | 31479349       | 31491069       | 4276           | MICA           |
| rs2462957 | 17  | 36095487  | +      | A/G      | 2  | ADD  | 1107  | 1.609  | 5.167  | 2.82E-06 | 36107768       | 36113528       | 192666         | KRT24          |
| rs2476601 | 1   | 114179091 | +      | A/G      | 1  | ADD  | 1115  | 2.338  | 6.563  | 1.37E-09 | 114157960      | 114215857      | 26191          | PTPN22         |
| rs2516049 | 6   | 32678378  | -      | A/G      | 2  | ADD  | 1115  | 2.262  | 7.924  | 4.16E-14 | 32654524       | 32665540       | 3123           | HLA-DRB1       |
| rs2516390 | 6   | 31637862  | -      | A/G      | 2  | ADD  | 1115  | 0.5066 | -6.473 | 1.33E-09 | 31623350       | 31634585       | 4795           | NFKBIL1        |
| rs2516398 | 6   | 31589505  | -      | A/C      | 2  | ADD  | 1102  | 0.4679 | -6.566 | 1.67E-12 | 31573833       | 31586880       | 4277           | MICB           |
| rs2516400 | 6   | 31589084  | -      | C/T      | 1  | ADD  | 1108  | 1.903  | 6.835  | 4.98E-12 | 31573833       | 31586880       | 4277           | MICB           |
| rs2516415 | 6   | 31567721  | -      | C/T      | 1  | ADD  | 1106  | 1.869  | 6.686  | 5.31E-11 | 31573833       | 31586880       | 4277           | MICB           |
| rs2516424 | 6   | 31556294  | -      | C/T      | 2  | ADD  | 1104  | 1.962  | 7.279  | 3.54E-13 | 31538937       | 31541461       | 10866          | HCP5           |
| rs2523454 | 6   | 31475844  | -      | C/T      | 1  | ADD  | 1115  | 1.835  | 6.127  | 2.27E-07 | 31479349       | 31491069       | 4276           | MICA           |
| rs2523898 | 6   | 31101512  | -      | C/T      | 1  | ADD  | 1104  | 0.6055 | -5.228 | 4.48E-06 | 31059463       | 31065654       | 394263         | C6orf205       |
| rs2524279 | 6   | 31500885  | -      | C/T      | 2  | ADD  | 1114  | 2.347  | 4.923  | 1.09E-05 | 31479349       | 31491069       | 4276           | MICA           |
| rs2596472 | 6   | 31536946  | +      | A/G      | 2  | ADD  | 1092  | 0.4907 | -5.907 | 3.04E-08 | 31538937       | 31541461       | 10866          | HCP5           |
| rs2596560 | 6   | 31463297  | -      | A/G      | 2  | ADD  | 1111  | 2.016  | 6.765  | 3.21E-10 | 31479349       | 31491069       | 4276           | MICA           |
| rs2621373 | 6   | 32873108  | -      | A/G      | 2  | ADD  | 1115  | 0.4602 | -6.622 | 8.54E-11 | 32888517       | 32892803       | 3112           | HLA-DOB        |
| rs2647050 | 6   | 32777745  | +      | C/T      | 2  | ADD  | 1115  | 0.4053 | -8.085 | 1.85E-14 | 32735634       | 32742444       | 3119           | HLA-DQB1       |
| rs2717453 | 12  | 81349323  | -      | A/C      | 2  | ADD  | 1079  | 0.173  | -4.446 | 1.20E-05 | 81276454       | 81397076       | 84190          | C12orf26       |
| rs2734583 | 6   | 31613459  | -      | C/T      | 2  | ADD  | 1115  | 2.067  | 5.738  | 2.31E-07 | 31605974       | 31618204       | 7919           | BAT1           |
| rs2765283 | 1   | 118337941 | +      | C/T      | 1  | ADD  | 1100  | 5.842  | 14.02  | 8.31E-43 | 118297810      | 118529357      | 200162         | SPAG17         |
| rs2797409 | 1   | 114131725 | +      | C/T      | 2  | ADD  | 1115  | 1.666  | 5.107  | 1.20E-06 | 114105976      | 114156593      | 54665          | RSBN1          |
| rs2844484 | 6   | 31644203  | -      | C/T      | 1  | ADD  | 1113  | 0.506  | -6.483 | 1.25E-09 | 31648071       | 31650077       | 4049           | LTA            |
| rs2844494 | 6   | 31591394  | -      | G/T      | 2  | ADD  | 1108  | 0.4561 | -6.768 | 1.78E-13 | 31573833       | 31586880       | 4277           | MICB           |
| rs2844533 | 6   | 31458781  | -      | C/T      | 2  | ADD  | 1115  | 0.5426 | -5.089 | 3.06E-08 | 31479349       | 31491069       | 4276           | MICA           |
| rs2844697 | 6   | 31040288  | -      | A/G      | 1  | ADD  | 1115  | 1.675  | 5.6    | 6.42E-08 | 31027537       | 31029977       | 135656         | DPCR1          |
| rs285019  | 16  | 75656951  | +      | A/G      | 2  | ADD  | 1098  | 1.771  | 5.893  | 4.18E-08 | Intergenic SNP | Intergenic SNP | Intergenic SNP | Intergenic SNP |
| rs2855812 | 6   | 31580699  | +      | G/T      | 1  | ADD  | 1115  | 2.187  | 7.743  | 4.61E-12 | 31573833       | 31586880       | 4277           | MICB           |

| SNP       | CHR | BP       | strand | observer | A1 | TEST | NMISS | OR      | STAT   | Pvalue   | txStart  | txEnd    | GeneID | Gene Symb |
|-----------|-----|----------|--------|----------|----|------|-------|---------|--------|----------|----------|----------|--------|-----------|
| rs2856705 | 6   | 32778934 | -      | A/G      | 1  | ADD  | 1114  | 0.3939  | -4.632 | 2.00E-06 | 32735634 | 32742444 | 3119   | HLA-DQB1  |
| rs2856718 | 6   | 32778233 | -      | A/G      | 1  | ADD  | 1113  | 0.4065  | -8.064 | 2.24E-14 | 32735634 | 32742444 | 3119   | HLA-DQB1  |
| rs2857106 | 6   | 32895548 | -      | A/G      | 2  | ADD  | 1114  | 0.4021  | -5.972 | 1.09E-08 | 32897587 | 32914525 | 6891   | TAP2      |
| rs2857596 | 6   | 31675401 | -      | A/C      | 2  | ADD  | 1077  | 0.4608  | -5.793 | 2.68E-10 | 31664650 | 31668741 | 259197 | NCR3      |
| rs2858308 | 6   | 32777978 | -      | A/C      | 1  | ADD  | 1114  | 0.3935  | -4.637 | 2.00E-06 | 32735634 | 32742444 | 3119   | HLA-DQB1  |
| rs2858331 | 6   | 32789255 | -      | C/T      | 2  | ADD  | 1115  | 0.3076  | -10.21 | 2.27E-22 | 32817140 | 32823199 | 3118   | HLA-DQA2  |
| rs2858870 | 6   | 32680229 | -      | A/G      | 2  | ADD  | 1112  | 0.3045  | -5.93  | 1.30E-09 | 32654524 | 32665540 | 3123   | HLA-DRB1  |
| rs2905722 | 6   | 31557306 | -      | C/T      | 1  | ADD  | 1115  | 0.4111  | -5.122 | 1.73E-08 | 31538937 | 31541461 | 10866  | HCP5      |
| rs3093993 | 6   | 31598704 | -      | G/T      | 2  | ADD  | 1115  | 0.5705  | -4.487 | 2.45E-06 | 31604717 | 31605987 | 401250 | MCCD1     |
| rs3095227 | 6   | 31598979 | -      | C/T      | 1  | ADD  | 1111  | 0.5761  | -4.411 | 3.28E-06 | 31604717 | 31605987 | 401250 | MCCD1     |
| rs3099844 | 6   | 31556955 | +      | A/C      | 1  | ADD  | 1113  | 2.146   | 5.971  | 5.29E-08 | 31538937 | 31541461 | 10866  | HCP5      |
| rs3101942 | 6   | 32978035 | -      | C/T      | 2  | ADD  | 1109  | 0.4813  | -6.871 | 1.54E-11 | 33010392 | 33016795 | 3109   | HLA-DMB   |
| rs3104404 | 6   | 32790152 | +      | A/C      | 1  | ADD  | 1114  | 0.3496  | -6.913 | 2.54E-10 | 32817140 | 32823199 | 3118   | HLA-DQA2  |
| rs3104405 | 6   | 32790286 | +      | A/C      | 2  | ADD  | 1114  | 0.5209  | -5.739 | 1.13E-08 | 32817140 | 32823199 | 3118   | HLA-DQA2  |
| rs3115573 | 6   | 32326821 | -      | C/T      | 2  | ADD  | 1115  | 1.604   | 4.821  | 6.73E-08 | 32270597 | 32299822 | 4855   | NOTCH4    |
| rs3115663 | 6   | 31709822 | -      | A/G      | 2  | ADD  | 1115  | 2.054   | 6.392  | 1.19E-08 | 31696428 | 31713533 | 7916   | BAT2      |
| rs3117098 | 6   | 32466491 | -      | C/T      | 2  | ADD  | 1115  | 0.3942  | -7.674 | 1.94E-12 | 32470490 | 32482878 | 56244  | BTNL2     |
| rs3117583 | 6   | 31727555 | -      | C/T      | 2  | ADD  | 1114  | 2.063   | 6.423  | 9.74E-09 | 31714783 | 31728456 | 7917   | BAT3      |
| rs3129860 | 6   | 32509057 | +      | A/G      | 1  | ADD  | 1115  | 0.03742 | -6.463 | 4.20E-11 | 32515624 | 32520802 | 3122   | HLA-DRA   |
| rs3129871 | 6   | 32514320 | +      | A/C      | 1  | ADD  | 1115  | 0.1948  | -11.4  | 3.76E-30 | 32515624 | 32520802 | 3122   | HLA-DRA   |
| rs3129882 | 6   | 32517508 | +      | A/G      | 2  | ADD  | 1115  | 0.3295  | -9.813 | 8.78E-20 | 32515624 | 32520802 | 3122   | HLA-DRA   |
| rs3129934 | 6   | 32444165 | +      | C/T      | 1  | ADD  | 1114  | 0.159   | -8.173 | 3.40E-16 | 32368452 | 32447634 | 10665  | C6orf10   |
| rs3129941 | 6   | 32445664 | +      | A/G      | 1  | ADD  | 1113  | 0.2021  | -9.279 | 1.41E-20 | 32368452 | 32447634 | 10665  | C6orf10   |
| rs3129962 | 6   | 32487361 | +      | A/C/G    | 1  | ADD  | 1092  | 2.755   | 7.276  | 1.13E-10 | 32470490 | 32482878 | 56244  | BTNL2     |
| rs3129963 | 6   | 32488186 | +      | A/G      | 2  | ADD  | 1113  | 1.913   | 5.386  | 8.06E-06 | 32470490 | 32482878 | 56244  | BTNL2     |
| rs3130050 | 6   | 31726740 | +      | A/G      | 2  | ADD  | 1115  | 0.2833  | -6.299 | 2.95E-11 | 31714783 | 31728456 | 7917   | BAT3      |
| rs3130055 | 6   | 31605378 | +      | C/T      | 2  | ADD  | 1115  | 0.5175  | -5.402 | 5.47E-08 | 31604717 | 31605987 | 401250 | MCCD1     |
| rs3130315 | 6   | 32328663 | +      | A/G      | 1  | ADD  | 1115  | 1.604   | 4.821  | 6.73E-08 | 32270597 | 32299822 | 4855   | NOTCH4    |
| rs3130544 | 6   | 31166319 | +      | A/C      | 1  | ADD  | 1115  | 1.963   | 5.287  | 5.96E-06 | 31186978 | 31188311 | 29113  | C6orf15   |
| rs3130617 | 6   | 31735502 | +      | C/T      | 2  | ADD  | 1112  | 0.3655  | -7.277 | 1.81E-15 | 31734053 | 31736528 | 57827  | C6orf47   |
| rs3130618 | 6   | 31740113 | +      | A/C      | 1  | ADD  | 1115  | 2.037   | 6.341  | 1.71E-08 | 31737840 | 31741142 | 7918   | BAT4      |
| rs3130637 | 6   | 31596124 | -      | C/T      | 1  | ADD  | 1115  | 0.5705  | -4.487 | 2.45E-06 | 31604717 | 31605987 | 401250 | MCCD1     |
| rs3130931 | 6   | 31242867 | -      | A/G      | 1  | ADD  | 1115  | 0.6078  | -4.514 | 8.10E-08 | 31240092 | 31246430 | 5460   | POU5F1    |
| rs3131063 | 6   | 30871735 | +      | A/G      | 1  | ADD  | 1115  | 1.573   | 4.89   | 2.31E-06 | 30818954 | 30820306 | 8870   | IER3      |

| SNP       | CHR | BP        | strand | observer | A1 | TEST | NMISS | OR     | STAT   | Pvalue   | txStart        | txEnd          | GeneID         | Gene Symb      |
|-----------|-----|-----------|--------|----------|----|------|-------|--------|--------|----------|----------------|----------------|----------------|----------------|
| rs3131296 | 6   | 32280971  | -      | A/G      | 1  | ADD  | 1104  | 2.01   | 5.594  | 1.00E-06 | 32270597       | 32299822       | 4855           | NOTCH4         |
| rs3131379 | 6   | 31829012  | -      | C/T      | 1  | ADD  | 1113  | 2.418  | 6.626  | 5.59E-09 | 31815752       | 31838431       | 4439           | MSH5           |
| rs3132131 | 6   | 33007463  | +      | A/G      | 1  | ADD  | 1115  | 0.5537 | -5.347 | 2.72E-07 | 33010392       | 33016795       | 3109           | HLA-DMB        |
| rs3132486 | 6   | 31351149  | -      | C/T      | 2  | ADD  | 1064  | 0.533  | -6.516 | 1.85E-09 | 31344507       | 31347834       | 3107           | HLA-C          |
| rs3132946 | 6   | 32298006  | +      | A/G      | 1  | ADD  | 1115  | 0.2013 | -6.682 | 2.62E-12 | 32270597       | 32299822       | 4855           | NOTCH4         |
| rs3134603 | 6   | 32233980  | -      | C/T      | 1  | ADD  | 1108  | 0.2143 | -6.669 | 1.32E-11 | 32229278       | 32239430       | 9374           | PPT2           |
| rs3134792 | 6   | 31420305  | -      | A/C      | 2  | ADD  | 1083  | 2.416  | 6.406  | 2.52E-09 | 31429627       | 31432968       | 3106           | HLA-B          |
| rs3134942 | 6   | 32276749  | -      | A/C      | 1  | ADD  | 1092  | 1.966  | 5.408  | 2.27E-06 | 32270597       | 32299822       | 4855           | NOTCH4         |
| rs3134943 | 6   | 32255739  | -      | A/G      | 1  | ADD  | 1112  | 0.2067 | -6.844 | 1.04E-12 | 32254139       | 32256548       | 6048           | RNF5           |
| rs3134954 | 6   | 32179871  | -      | A/G      | 2  | ADD  | 1115  | 0.1743 | -7.117 | 1.50E-13 | 32116910       | 32185129       | 7148           | TNXB           |
| rs3135338 | 6   | 32509195  | -      | A/G      | 2  | ADD  | 1088  | 0.2077 | -10.61 | 8.90E-26 | 32515624       | 32520802       | 3122           | HLA-DRA        |
| rs3135353 | 6   | 32500855  | -      | A/G      | 1  | ADD  | 1115  | 2.446  | 7.046  | 5.49E-10 | 32515624       | 32520802       | 3122           | HLA-DRA        |
| rs329312  | 5   | 133928397 | +      | A/G      | 2  | ADD  | 1085  | 2.297  | 8.051  | 2.33E-14 | 133889696      | 133946817      | 23338          | PHF15          |
| rs3738894 | 2   | 46267673  | -      | C/T      | 1  | ADD  | 1078  | 16.39  | 5.166  | 5.91E-07 | 45732546       | 46268633       | 5581           | PRKCE          |
| rs3763309 | 6   | 32483951  | +      | A/C      | 1  | ADD  | 1115  | 3.672  | 11.12  | 2.47E-26 | 32470490       | 32482878       | 56244          | BTNL2          |
| rs3763312 | 6   | 32484326  | +      | A/G      | 1  | ADD  | 1110  | 3.695  | 11.17  | 1.44E-26 | 32470490       | 32482878       | 56244          | BTNL2          |
| rs3763313 | 6   | 32484449  | +      | A/C      | 2  | ADD  | 1115  | 0.4729 | -5.274 | 4.63E-07 | 32470490       | 32482878       | 56244          | BTNL2          |
| rs3763349 | 6   | 32916210  | -      | C/T      | 1  | ADD  | 1115  | 0.5982 | -5.242 | 6.43E-08 | 32916471       | 32920690       | 5696           | PSMB8          |
| rs377763  | 6   | 32307122  | -      | G/T      | 1  | ADD  | 1115  | 1.689  | 4.888  | 6.61E-06 | 32270597       | 32299822       | 4855           | NOTCH4         |
| rs3779312 | 7   | 77549692  | -      | A/G      | 1  | ADD  | 1108  | 1.885  | 6.168  | 1.37E-09 | 77484309       | 78920826       | 9863           | MAGI2          |
| rs3806156 | 6   | 32481676  | +      | G/T      | 1  | ADD  | 1115  | 1.938  | 6.805  | 3.55E-10 | 32470490       | 32482878       | 56244          | BTNL2          |
| rs3817963 | 6   | 32476065  | -      | A/G      | 2  | ADD  | 1115  | 2.355  | 8.324  | 5.40E-15 | 32470490       | 32482878       | 56244          | BTNL2          |
| rs3819715 | 6   | 32912197  | +      | G/T      | 1  | ADD  | 1115  | 0.5925 | -4.878 | 4.31E-06 | 32897587       | 32914525       | 6891           | TAP2           |
| rs3830041 | 6   | 32299317  | -      | A/G      | 1  | ADD  | 1114  | 0.2093 | -5.921 | 1.56E-08 | 32270597       | 32299822       | 4855           | NOTCH4         |
| rs3892710 | 6   | 32790840  | +      | C/T      | 1  | ADD  | 1115  | 2.795  | 8.813  | 6.53E-18 | 32817140       | 32823199       | 3118           | HLA-DQA2       |
| rs389884  | 6   | 32048876  | -      | C/T      | 2  | ADD  | 1115  | 2.364  | 6.509  | 1.27E-08 | 32045566       | 32048011       | 1797           | DOM3Z          |
| rs3916765 | 6   | 32793528  | +      | A/G      | 1  | ADD  | 1115  | 4.911  | 12.1   | 2.22E-32 | 32817140       | 32823199       | 3118           | HLA-DQA2       |
| rs3957148 | 6   | 32790115  | +      | A/G      | 2  | ADD  | 1114  | 7.888  | 14.55  | 3.10E-46 | 32817140       | 32823199       | 3118           | HLA-DQA2       |
| rs405875  | 6   | 32323166  | -      | A/G      | 2  | ADD  | 1115  | 1.621  | 4.934  | 2.66E-08 | 32270597       | 32299822       | 4855           | NOTCH4         |
| rs434841  | 6   | 32299019  | +      | A/G      | 1  | ADD  | 1106  | 2.093  | 7.781  | 3.75E-14 | 32270597       | 32299822       | 4855           | NOTCH4         |
| rs4713391 | 6   | 30900214  | +      | C/T      | 2  | ADD  | 1115  | 1.876  | 5.059  | 3.33E-06 | 30959839       | 30975912       | 780            | DDR1           |
| rs4758868 | 12  | 59232968  | +      | A/G      | 1  | ADD  | 1095  | 0.6194 | -5.03  | 4.58E-07 | Intergenic SNP | Intergenic SNP | Intergenic SNP | Intergenic SNP |
| rs477515  | 6   | 32677669  | -      | C/T      | 1  | ADD  | 1112  | 2.267  | 7.945  | 3.98E-14 | 32654524       | 32665540       | 3123           | HLA-DRB1       |
| rs4814335 | 20  | 15001067  | +      | A/G      | 1  | ADD  | 1096  | 3.29   | 12.02  | 7.39E-30 | 13924145       | 15981841       | 140733         | MACROD2        |

| SNP       | CHR | BP        | strand | observer | A1 | TEST | NMISS | OR     | STAT   | Pvalue   | txStart        | txEnd          | GeneID         | Gene Symb      |
|-----------|-----|-----------|--------|----------|----|------|-------|--------|--------|----------|----------------|----------------|----------------|----------------|
| rs4839335 | 1   | 114035394 | +      | A/G      | 2  | ADD  | 1114  | 1.636  | 4.907  | 3.50E-06 | 113734997      | 114030068      | 260425         | MAGI3          |
| rs485774  | 6   | 32398932  | -      | C/T      | 2  | ADD  | 1107  | 2.014  | 6.992  | 1.44E-12 | 32368452       | 32447634       | 10665          | C6orf10        |
| rs4862110 | 4   | 183988023 | +      | C/T      | 2  | ADD  | 1101  | 4.018  | 12.22  | 3.32E-32 | 183482130      | 183961171      | 55714          | ODZ3           |
| rs4891291 | 18  | 71374601  | +      | A/G      | 1  | ADD  | 1105  | 0.5332 | -6.186 | 2.26E-09 | 71250814       | 71268577       | 284274         | C18orf62       |
| rs4943552 | 13  | 37402142  | +      | C/T      | 2  | ADD  | 1102  | 2.726  | 9.895  | 1.52E-22 | 37108794       | 37341935       | 7223           | TRPC4          |
| rs4957798 | 5   | 108472453 | +      | C/T      | 1  | ADD  | 1103  | 3.284  | 10.9   | 9.73E-26 | 108111421      | 108551272      | 2241           | FER            |
| rs5000634 | 6   | 32771542  | -      | C/T      | 2  | ADD  | 1113  | 2.093  | 7.294  | 8.75E-15 | 32735634       | 32742444       | 3119           | HLA-DQB1       |
| rs532098  | 6   | 32686030  | -      | C/T      | 1  | ADD  | 1114  | 1.827  | 6.192  | 6.85E-09 | 32654524       | 32665540       | 3123           | HLA-DRB1       |
| rs547077  | 6   | 32397296  | +      | C/T      | 2  | ADD  | 1115  | 2.087  | 7.356  | 6.84E-14 | 32368452       | 32447634       | 10665          | C6orf10        |
| rs547261  | 6   | 32390011  | -      | C/T      | 1  | ADD  | 1110  | 2.03   | 7.126  | 5.05E-13 | 32368452       | 32447634       | 10665          | C6orf10        |
| rs558702  | 6   | 31978305  | -      | C/T      | 1  | ADD  | 1115  | 2.424  | 6.647  | 4.33E-09 | 31975372       | 31977748       | 221527         | ZBTB12         |
| rs6457617 | 6   | 32771829  | +      | C/T      | 2  | ADD  | 1110  | 0.6341 | -4.606 | 1.08E-07 | 32735634       | 32742444       | 3119           | HLA-DQB1       |
| rs660895  | 6   | 32685358  | +      | A/G      | 2  | ADD  | 1115  | 5.295  | 13.02  | 1.56E-36 | 32654524       | 32665540       | 3123           | HLA-DRB1       |
| rs6665194 | 1   | 114219366 | +      | A/G      | 1  | ADD  | 1114  | 1.638  | 5.279  | 7.13E-07 | 114220958      | 114231692      | 440603         | BCL2L15        |
| rs666619  | 6   | 138038815 | +      | A/G      | 2  | ADD  | 1078  | 1.562  | 4.484  | 4.89E-06 | Intergenic SNP | Intergenic SNP | Intergenic SNP | Intergenic SNP |
| rs6901084 | 6   | 32844914  | +      | C/T      | 1  | ADD  | 1115  | 0.5817 | -5.531 | 1.99E-06 | 32817140       | 32823199       | 3118           | HLA-DQA2       |
| rs6903130 | 6   | 32840188  | +      | A/G      | 1  | ADD  | 1113  | 0.5793 | -5.744 | 2.39E-07 | 32817140       | 32823199       | 3118           | HLA-DQA2       |
| rs6903608 | 6   | 32536263  | +      | C/T      | 2  | ADD  | 1113  | 0.2956 | -9.248 | 2.40E-18 | 32515624       | 32520802       | 3122           | HLA-DRA        |
| rs6906662 | 6   | 32374484  | +      | A/G      | 1  | ADD  | 1115  | 0.1635 | -4.829 | 6.31E-07 | 32368452       | 32447634       | 10665          | C6orf10        |
| rs6910071 | 6   | 32390832  | +      | A/G      | 2  | ADD  | 1115  | 3.334  | 10.3   | 1.27E-20 | 32368452       | 32447634       | 10665          | C6orf10        |
| rs6910985 | 6   | 52606650  | +      | A/C      | 1  | ADD  | 1114  | 1.612  | 4.839  | 5.29E-06 | 52643842       | 52659344       | 28978          | TMEM14A        |
| rs6912002 | 6   | 32873246  | +      | C/T      | 2  | ADD  | 1092  | 1.737  | 5.901  | 6.43E-09 | 32888517       | 32892803       | 3112           | HLA-DOB        |
| rs6924102 | 6   | 32919361  | +      | A/G      | 2  | ADD  | 1115  | 1.632  | 5.098  | 6.70E-07 | 32916471       | 32920690       | 5696           | PSMB8          |
| rs707928  | 6   | 31850569  | -      | C/T      | 2  | ADD  | 1114  | 1.754  | 5.665  | 1.08E-07 | 31841349       | 31853087       | 80737          | C6orf27        |
| rs7100025 | 10  | 37632544  | +      | A/G      | 2  | ADD  | 1082  | 3.263  | 11.01  | 4.57E-27 | Intergenic SNP | Intergenic SNP | Intergenic SNP | Intergenic SNP |
| rs719654  | 6   | 32860117  | -      | C/T      | 1  | ADD  | 1115  | 0.5179 | -5.069 | 1.28E-06 | 32888517       | 32892803       | 3112           | HLA-DOB        |
| rs721394  | 6   | 33225796  | -      | A/G      | 1  | ADD  | 1115  | 0.5367 | -4.492 | 7.54E-06 | 33238446       | 33268223       | 1302           | COL11A2        |
| rs7267722 | 20  | 22735622  | +      | C/T      | 2  | ADD  | 1111  | 46.88  | 16.78  | 1.25E-57 | Intergenic SNP | Intergenic SNP | Intergenic SNP | Intergenic SNP |
| rs7383287 | 6   | 32891064  | +      | A/G      | 2  | ADD  | 1115  | 1.694  | 5.056  | 3.65E-06 | 32888517       | 32892803       | 3112           | HLA-DOB        |
| rs7453920 | 6   | 32837990  | +      | A/G      | 1  | ADD  | 1113  | 1.962  | 7.064  | 1.17E-10 | 32817140       | 32823199       | 3118           | HLA-DQA2       |
| rs7503953 | 17  | 6082401   | +      | A/C      | 1  | ADD  | 1094  | 6.483  | 14.81  | 2.41E-46 | Intergenic SNP | Intergenic SNP | Intergenic SNP | Intergenic SNP |
| rs7529353 | 1   | 114221985 | +      | A/G      | 1  | ADD  | 1115  | 1.706  | 5.283  | 6.33E-07 | 114220958      | 114231692      | 440603         | BCL2L15        |
| rs7630157 | 3   | 169797194 | +      | A/C      | 2  | ADD  | 1107  | 6.125  | 8.52   | 4.51E-17 | Intergenic SNP | Intergenic SNP | Intergenic SNP | Intergenic SNP |
| rs7636581 | 3   | 191263889 | +      | A/G      | 1  | ADD  | 1103  | 2.215  | 6.322  | 8.47E-10 | 191157315      | 191321412      | 55214          | LEPREL1        |



| SNP       | CHR | BP        | strand | observer | A1 | TEST | NMISS | OR      | STAT   | Pvalue   | txStart        | txEnd          | GeneID         | Gene Symb      |
|-----------|-----|-----------|--------|----------|----|------|-------|---------|--------|----------|----------------|----------------|----------------|----------------|
| rs7679475 | 4   | 122533490 | +      | A/G      | 1  | ADD  | 1114  | 1.664   | 5.39   | 1.46E-05 | 122469246      | 122521631      | 84109          | GPR103         |
| rs7726659 | 5   | 74513834  | +      | A/G      | 2  | ADD  | 1109  | 3.242   | 5.235  | 1.81E-07 | Intergenic SNP | Intergenic SNP | Intergenic SNP | Intergenic SNP |
| rs7745656 | 6   | 32788948  | +      | G/T      | 1  | ADD  | 1114  | 0.3354  | -8.392 | 1.77E-15 | 32817140       | 32823199       | 3118           | HLA-DQA2       |
| rs7750641 | 6   | 31237289  | +      | C/T      | 1  | ADD  | 1111  | 2.054   | 5.592  | 1.16E-06 | 31234281       | 31239971       | 6941           | TCF19          |
| rs7753935 | 6   | 30168762  | +      | A/C      | 1  | ADD  | 1115  | 0.385   | -6.101 | 7.40E-09 | 30178652       | 30188846       | 11074          | TRIM31         |
| rs7755596 | 6   | 32814456  | +      | C/T      | 2  | ADD  | 1102  | 1.986   | 6.435  | 1.89E-09 | 32817140       | 32823199       | 3118           | HLA-DQA2       |
| rs7756516 | 6   | 32831895  | +      | C/T      | 1  | ADD  | 1115  | 0.5507  | -6.212 | 3.82E-08 | 32817140       | 32823199       | 3118           | HLA-DQA2       |
| rs7762279 | 6   | 32863268  | +      | C/T      | 2  | ADD  | 1115  | 2.402   | 6.329  | 2.07E-08 | 32888517       | 32892803       | 3112           | HLA-DOB        |
| rs7765810 | 6   | 30171475  | +      | A/C      | 1  | ADD  | 1114  | 0.4436  | -5.87  | 2.47E-08 | 30178652       | 30188846       | 11074          | TRIM31         |
| rs7767167 | 6   | 32873160  | +      | A/G      | 2  | ADD  | 1115  | 0.2891  | -5.795 | 2.09E-09 | 32888517       | 32892803       | 3112           | HLA-DOB        |
| rs7773694 | 6   | 32814312  | +      | A/G      | 1  | ADD  | 1115  | 2.05    | 6.685  | 3.33E-10 | 32817140       | 32823199       | 3118           | HLA-DQA2       |
| rs7774434 | 6   | 32765556  | +      | C/T      | 2  | ADD  | 1108  | 1.785   | 5.875  | 6.71E-09 | 32735634       | 32742444       | 3119           | HLA-DQB1       |
| rs7775397 | 6   | 32369230  | +      | G/T      | 2  | ADD  | 1111  | 2.564   | 7      | 1.10E-09 | 32368452       | 32447634       | 10665          | C6orf10        |
| rs7897675 | 10  | 38448572  | +      | A/C      | 2  | ADD  | 1083  | 0.06245 | -4.713 | 3.81E-06 | 38423280       | 38452284       | 7587           | ZNF37A         |
| rs7943716 | 11  | 76515147  | +      | A/G      | 1  | ADD  | 1097  | 0.44    | -7.555 | 1.82E-12 | 76455639       | 76514846       | 726            | CAPN5          |
| rs7970177 | 12  | 13630255  | +      | C/T      | 1  | ADD  | 1106  | 2.309   | 6.467  | 1.61E-10 | 13605676       | 14024289       | 2904           | GRIN2B         |
| rs805294  | 6   | 31796196  | -      | C/T      | 2  | ADD  | 1115  | 1.639   | 5.063  | 2.52E-06 | 31794403       | 31797489       | 80740          | LY6G6C         |
| rs805303  | 6   | 31724345  | -      | C/T      | 1  | ADD  | 1114  | 1.876   | 6.466  | 1.72E-09 | 31714783       | 31728456       | 7917           | BAT3           |
| rs887464  | 6   | 31253899  | -      | A/G      | 1  | ADD  | 1115  | 1.817   | 6.449  | 1.55E-08 | 31240092       | 31246430       | 5460           | POU5F1         |
| rs910049  | 6   | 32423705  | -      | A/G      | 1  | ADD  | 1113  | 0.2194  | -9.117 | 1.09E-19 | 32368452       | 32447634       | 10665          | C6orf10        |
| rs9257802 | 6   | 29451334  | +      | C/T      | 1  | ADD  | 1110  | 1.667   | 4.604  | 1.20E-05 | 29449178       | 29451047       | 81797          | OR12D3         |
| rs926070  | 6   | 32365544  | -      | C/T      | 2  | ADD  | 1115  | 0.311   | -9.106 | 3.72E-19 | 32368452       | 32447634       | 10665          | C6orf10        |
| rs9267649 | 6   | 31932807  | +      | A/G      | 1  | ADD  | 1115  | 0.1998  | -7.954 | 1.18E-16 | 31934807       | 31938688       | 4758           | NEU1           |
| rs9267658 | 6   | 31953964  | +      | C/T      | 1  | ADD  | 1115  | 0.2312  | -6.57  | 3.01E-12 | 31938948       | 31954802       | 80736          | SLC44A4        |
| rs9267992 | 6   | 32328375  | +      | A/G      | 2  | ADD  | 1115  | 0.1167  | -7.36  | 3.02E-14 | 32270597       | 32299822       | 4855           | NOTCH4         |
| rs9268005 | 6   | 32332366  | +      | A/C      | 2  | ADD  | 1098  | 0.3246  | -8.831 | 5.50E-18 | 32270597       | 32299822       | 4855           | NOTCH4         |
| rs9268132 | 6   | 32362632  | +      | A/G      | 2  | ADD  | 1110  | 2.041   | 7.159  | 4.10E-13 | 32368452       | 32447634       | 10665          | C6orf10        |
| rs9268368 | 6   | 32441933  | +      | C/T      | 2  | ADD  | 1115  | 2.035   | 7.139  | 4.51E-13 | 32368452       | 32447634       | 10665          | C6orf10        |
| rs9268384 | 6   | 32444564  | +      | A/G      | 2  | ADD  | 1111  | 2.032   | 7.121  | 4.92E-13 | 32368452       | 32447634       | 10665          | C6orf10        |
| rs9268528 | 6   | 32491086  | +      | A/G      | 2  | ADD  | 1113  | 2.625   | 9.055  | 2.76E-21 | 32470490       | 32482878       | 56244          | BTNL2          |
| rs9268530 | 6   | 32491201  | +      | C/T      | 2  | ADD  | 1112  | 2.114   | 6.069  | 2.77E-07 | 32470490       | 32482878       | 56244          | BTNL2          |
| rs9268542 | 6   | 32492699  | +      | A/G      | 2  | ADD  | 1115  | 2.584   | 8.932  | 6.51E-21 | 32470490       | 32482878       | 56244          | BTNL2          |
| rs9268615 | 6   | 32510867  | +      | A/G      | 1  | ADD  | 1115  | 2.648   | 9.134  | 1.60E-21 | 32515624       | 32520802       | 3122           | HLA-DRA        |
| rs9271366 | 6   | 32694832  | +      | A/G      | 2  | ADD  | 1115  | 0.02764 | -6.138 | 2.78E-10 | 32713160       | 32719407       | 3117           | HLA-DQA1       |

| SNP       | CHR | BP       | strand | observer | A1 | TEST | NMISS | OR     | STAT   | Pvalue   | txStart  | txEnd    | GeneID | Gene Symb |
|-----------|-----|----------|--------|----------|----|------|-------|--------|--------|----------|----------|----------|--------|-----------|
| rs9275141 | 6   | 32759095 | +      | G/T      | 1  | ADD  | 1109  | 0.65   | -4.481 | 1.04E-06 | 32735634 | 32742444 | 3119   | HLA-DQB1  |
| rs9275184 | 6   | 32762692 | +      | C/T      | 2  | ADD  | 1102  | 7.025  | 14.76  | 8.67E-47 | 32735634 | 32742444 | 3119   | HLA-DQB1  |
| rs9275224 | 6   | 32767856 | +      | A/G      | 1  | ADD  | 1115  | 0.6293 | -4.678 | 7.29E-08 | 32735634 | 32742444 | 3119   | HLA-DQB1  |
| rs9275312 | 6   | 32773706 | +      | A/G      | 2  | ADD  | 1115  | 6.177  | 13.69  | 5.43E-41 | 32735634 | 32742444 | 3119   | HLA-DQB1  |
| rs9275328 | 6   | 32774800 | +      | C/T      | 1  | ADD  | 1110  | 6.24   | 13.7   | 4.43E-41 | 32735634 | 32742444 | 3119   | HLA-DQB1  |
| rs9275374 | 6   | 32776504 | +      | C/T      | 1  | ADD  | 1115  | 3.028  | 10.09  | 9.44E-24 | 32735634 | 32742444 | 3119   | HLA-DQB1  |
| rs9275383 | 6   | 32776824 | +      | G/T      | 1  | ADD  | 1097  | 7.896  | 14.32  | 1.20E-44 | 32735634 | 32742444 | 3119   | HLA-DQB1  |
| rs9275390 | 6   | 32777134 | +      | C/T      | 2  | ADD  | 1112  | 3.043  | 10.1   | 8.41E-24 | 32735634 | 32742444 | 3119   | HLA-DQB1  |
| rs9275393 | 6   | 32777417 | +      | A/G      | 1  | ADD  | 1115  | 3.028  | 10.09  | 9.44E-24 | 32735634 | 32742444 | 3119   | HLA-DQB1  |
| rs9275406 | 6   | 32777933 | +      | G/T      | 1  | ADD  | 1113  | 3.034  | 10.1   | 8.11E-24 | 32735634 | 32742444 | 3119   | HLA-DQB1  |
| rs9275407 | 6   | 32778015 | +      | G/T      | 1  | ADD  | 1113  | 3.018  | 10.06  | 1.24E-23 | 32735634 | 32742444 | 3119   | HLA-DQB1  |
| rs9275418 | 6   | 32778222 | +      | A/G      | 2  | ADD  | 1115  | 3.028  | 10.09  | 9.44E-24 | 32735634 | 32742444 | 3119   | HLA-DQB1  |
| rs9275424 | 6   | 32778554 | +      | A/G      | 2  | ADD  | 1113  | 3.104  | 10.23  | 2.25E-24 | 32735634 | 32742444 | 3119   | HLA-DQB1  |
| rs9275425 | 6   | 32778852 | +      | A/C      | 1  | ADD  | 1114  | 3.029  | 10.09  | 8.47E-24 | 32735634 | 32742444 | 3119   | HLA-DQB1  |
| rs9275427 | 6   | 32778893 | +      | C/T      | 1  | ADD  | 1114  | 3.023  | 10.07  | 1.11E-23 | 32735634 | 32742444 | 3119   | HLA-DQB1  |
| rs9275428 | 6   | 32778956 | +      | A/G      | 2  | ADD  | 1114  | 3.023  | 10.07  | 1.11E-23 | 32735634 | 32742444 | 3119   | HLA-DQB1  |
| rs9275439 | 6   | 32779499 | +      | C/T      | 2  | ADD  | 1112  | 3.048  | 10.12  | 6.18E-24 | 32735634 | 32742444 | 3119   | HLA-DQB1  |
| rs9275595 | 6   | 32789333 | +      | C/T      | 2  | ADD  | 1114  | 3.303  | 10.38  | 5.64E-25 | 32817140 | 32823199 | 3118   | HLA-DQA2  |
| rs9275602 | 6   | 32790790 | +      | A/C      | 1  | ADD  | 1107  | 2.181  | 6.569  | 1.57E-08 | 32817140 | 32823199 | 3118   | HLA-DQA2  |
| rs9276162 | 6   | 32806435 | +      | A/G      | 2  | ADD  | 1113  | 2.038  | 6.629  | 2.51E-10 | 32817140 | 32823199 | 3118   | HLA-DQA2  |
| rs9276726 | 6   | 32871866 | +      | C/T      | 2  | ADD  | 1115  | 1.784  | 6.135  | 1.88E-09 | 32888517 | 32892803 | 3112   | HLA-DOB   |
| rs9276734 | 6   | 32874832 | +      | A/G      | 1  | ADD  | 1109  | 1.726  | 5.825  | 1.19E-08 | 32888517 | 32892803 | 3112   | HLA-DOB   |
| rs9276831 | 6   | 32940011 | +      | A/G      | 2  | ADD  | 1109  | 0.4133 | -5.299 | 2.85E-06 | 32929915 | 32935606 | 5698   | PSMB9     |
| rs928815  | 6   | 31639194 | -      | A/C      | 1  | ADD  | 1115  | 0.5066 | -6.473 | 1.33E-09 | 31623350 | 31634585 | 4795   | NFKBIL1   |
| rs9296685 | 6   | 52587141 | +      | C/T      | 2  | ADD  | 1115  | 1.671  | 5.137  | 2.77E-06 | 52470158 | 52549821 | 9697   | TRAM2     |
| rs9357152 | 6   | 32772938 | +      | A/G      | 2  | ADD  | 1112  | 0.4767 | -5.962 | 8.70E-08 | 32735634 | 32742444 | 3119   | HLA-DQB1  |
| rs9357155 | 6   | 32917826 | +      | A/G      | 1  | ADD  | 1107  | 2.015  | 5.36   | 4.86E-07 | 32916471 | 32920690 | 5696   | PSMB8     |
| rs9368713 | 6   | 32405315 | +      | C/T      | 2  | ADD  | 1114  | 2.034  | 7.137  | 4.50E-13 | 32368452 | 32447634 | 10665  | C6orf10   |
| rs9368741 | 6   | 32845485 | +      | A/G      | 1  | ADD  | 1115  | 0.4398 | -7.015 | 2.64E-11 | 32817140 | 32823199 | 3118   | HLA-DQA2  |
| rs9379858 | 6   | 26475668 | +      | C/T      | 2  | ADD  | 1107  | 2.601  | 8.549  | 1.47E-15 | 26473376 | 26486527 | 11118  | BTN3A2    |
| rs9391858 | 6   | 32449376 | +      | A/G      | 2  | ADD  | 1115  | 0.4355 | -5.025 | 2.76E-07 | 32368452 | 32447634 | 10665  | C6orf10   |
| rs9405090 | 6   | 32406350 | +      | A/G      | 2  | ADD  | 1115  | 2.035  | 7.139  | 4.51E-13 | 32368452 | 32447634 | 10665  | C6orf10   |
| rs9461799 | 6   | 32797507 | +      | C/T      | 2  | ADD  | 1115  | 0.6051 | -4.995 | 5.08E-06 | 32817140 | 32823199 | 3118   | HLA-DQA2  |
| rs9501239 | 6   | 33003558 | +      | A/G      | 2  | ADD  | 1109  | 2.985  | 5.957  | 2.35E-08 | 33010392 | 33016795 | 3109   | HLA-DMB   |

| SNP       | CHR | BP       | strand | observer | A1 | TEST | NMISS | OR    | STAT  | Pvalue   | txStart  | txEnd    | GeneID | Gene Symb |
|-----------|-----|----------|--------|----------|----|------|-------|-------|-------|----------|----------|----------|--------|-----------|
| rs9784758 | 6   | 32896489 | +      | C/T      | 2  | ADD  | 1115  | 2.646 | 5.994 | 6.39E-08 | 32897587 | 32914525 | 6891   | TAP2      |
| rs9837352 | 3   | 37957465 | +      | C/T      | 2  | ADD  | 1087  | 5.76  | 12.75 | 5.98E-34 | 37878672 | 38000964 | 10217  | CTDSPL    |
| rs991760  | 6   | 32931545 | -      | C/T      | 1  | ADD  | 1115  | 2.347 | 5.01  | 1.93E-06 | 32929915 | 32935606 | 5698   | PSMB9     |

**Supplemental Table D2: Genotype counts for SNPs showing evidence for association**

| SNP        | CHR | A1 | A2 | GENOTYPE COUNTS |             |
|------------|-----|----|----|-----------------|-------------|
|            |     |    |    | Affected        | Unaffected  |
| rs1015166  | 6   | 1  | 2  | 82/153/111      | 58/328/341  |
| rs1033500  | 6   | 1  | 2  | 93/201/52       | 117/339/255 |
| rs1046089  | 6   | 1  | 2  | 74/182/90       | 65/321/341  |
| rs10484565 | 6   | 1  | 2  | 5/81/260        | 6/86/633    |
| rs10484566 | 6   | 2  | 1  | 2/66/278        | 3/67/657    |
| rs10493321 | 1   | 2  | 1  | 34/138/148      | 32/232/463  |
| rs1053924  | 6   | 1  | 2  | 17/109/220      | 76/299/352  |
| rs1063355  | 6   | 1  | 2  | 5/86/255        | 122/339/266 |
| rs10807113 | 6   | 1  | 2  | 46/159/141      | 195/361/171 |
| rs1111695  | 1   | 2  | 1  | 90/154/102      | 97/339/291  |
| rs11244    | 6   | 1  | 2  | 72/156/118      | 56/296/372  |
| rs1150752  | 6   | 2  | 1  | 10/122/214      | 1/128/586   |
| rs1150754  | 6   | 1  | 2  | 24/143/179      | 13/159/552  |
| rs12153855 | 6   | 2  | 1  | 0/20/326        | 10/142/575  |
| rs1217407  | 1   | 1  | 2  | 52/133/161      | 36/270/421  |
| rs1217418  | 1   | 1  | 2  | 112/153/81      | 129/355/241 |
| rs12177980 | 6   | 1  | 2  | 31/148/167      | 120/368/238 |
| rs12190167 | 6   | 1  | 2  | 12/113/221      | 12/129/586  |
| rs12192704 | 6   | 1  | 2  | 12/119/215      | 13/143/571  |
| rs12197154 | 6   | 2  | 1  | 12/113/220      | 15/125/587  |
| rs12198173 | 6   | 1  | 2  | 0/17/329        | 5/129/593   |
| rs12198723 | 6   | 2  | 1  | 12/105/226      | 12/106/592  |
| rs12210947 | 6   | 2  | 1  | 14/133/199      | 17/172/535  |
| rs1230647  | 1   | 2  | 1  | 51/134/161      | 36/273/418  |
| rs1230661  | 1   | 1  | 2  | 46/130/170      | 29/253/445  |
| rs12529049 | 6   | 1  | 2  | 2/45/299        | 14/172/541  |
| rs12566340 | 1   | 1  | 2  | 51/130/165      | 33/264/430  |
| rs1265099  | 6   | 2  | 1  | 105/158/83      | 114/340/272 |
| rs1265110  | 6   | 1  | 2  | 8/104/234       | 10/120/597  |
| rs1265758  | 6   | 1  | 2  | 10/128/202      | 132/351/244 |
| rs1265759  | 6   | 2  | 1  | 10/129/207      | 136/358/233 |
| rs12663103 | 6   | 2  | 1  | 0/9/337         | 0/84/641    |
| rs1270942  | 6   | 2  | 1  | 10/122/213      | 8/131/588   |
| rs13199524 | 6   | 1  | 2  | 0/17/329        | 5/127/595   |
| rs13199787 | 6   | 1  | 2  | 30/147/169      | 122/373/232 |
| rs13403098 | 2   | 1  | 2  | 19/98/223       | 6/161/559   |
| rs13437000 | 6   | 2  | 1  | 5/66/275        | 29/220/468  |
| rs1383261  | 6   | 1  | 2  | 83/160/103      | 88/327/312  |
| rs1390266  | 4   | 2  | 1  | 21/88/233       | 2/144/581   |
| rs1480380  | 6   | 1  | 2  | 7/99/240        | 7/98/621    |
| rs1521     | 6   | 2  | 1  | 8/90/248        | 54/226/396  |
| rs154978   | 6   | 2  | 1  | 33/145/168      | 159/365/203 |

| SNP        | CHR | A1 | A2 | GENOTYPE COUNTS |             |
|------------|-----|----|----|-----------------|-------------|
|            |     |    |    | Affected        | Unaffected  |
| rs154981   | 6   | 2  | 1  | 34/149/162      | 169/368/185 |
| rs1573649  | 6   | 1  | 2  | 50/167/129      | 205/354/163 |
| rs16898264 | 6   | 1  | 2  | 20/96/229       | 108/349/266 |
| rs16908361 | 12  | 1  | 2  | 74/175/84       | 0/1/724     |
| rs17087141 | 18  | 2  | 1  | 19/8/318        | 0/6/721     |
| rs17100060 | 12  | 2  | 1  | 87/75/179       | 9/137/581   |
| rs17231696 | 8   | 1  | 2  | 8/88/250        | 7/104/602   |
| rs17475879 | 6   | 1  | 2  | 0/21/325        | 4/119/604   |
| rs17500468 | 6   | 2  | 1  | 3/36/307        | 11/163/548  |
| rs17533090 | 6   | 1  | 2  | 2/41/303        | 28/191/508  |
| rs17641748 | 5   | 1  | 2  | 60/96/178       | 7/113/606   |
| rs17679624 | 6   | 1  | 2  | 1/6/317         | 5/95/622    |
| rs1794282  | 6   | 1  | 2  | 7/132/207       | 8/120/599   |
| rs1894406  | 6   | 1  | 2  | 13/101/232      | 77/336/311  |
| rs1927906  | 9   | 2  | 1  | 16/80/239       | 10/108/609  |
| rs1980493  | 6   | 2  | 1  | 9/152/185       | 14/168/542  |
| rs1991914  | 4   | 2  | 1  | 22/78/230       | 85/333/309  |
| rs2051549  | 6   | 2  | 1  | 113/172/61      | 116/328/264 |
| rs2066363  | 1   | 2  | 1  | 17/47/274       | 101/333/292 |
| rs2071469  | 6   | 1  | 2  | 18/117/211      | 93/341/292  |
| rs2071472  | 6   | 1  | 2  | 9/91/246        | 59/310/358  |
| rs2071474  | 6   | 1  | 2  | 9/91/246        | 59/310/358  |
| rs2071538  | 6   | 1  | 2  | 7/76/263        | 33/257/437  |
| rs2071540  | 6   | 1  | 2  | 25/137/184      | 118/363/246 |
| rs2071543  | 6   | 1  | 2  | 10/123/213      | 11/156/560  |
| rs2071550  | 6   | 1  | 2  | 11/102/233      | 72/328/327  |
| rs2071554  | 6   | 1  | 2  | 3/72/271        | 0/56/671    |
| rs2074488  | 6   | 1  | 2  | 14/105/227      | 9/112/606   |
| rs2156875  | 6   | 2  | 1  | 35/184/127      | 185/355/187 |
| rs2187668  | 6   | 1  | 2  | 15/155/174      | 13/142/571  |
| rs2219893  | 6   | 2  | 1  | 9/106/228       | 71/317/325  |
| rs2227956  | 6   | 2  | 1  | 0/30/316        | 16/220/491  |
| rs2228397  | 6   | 1  | 2  | 5/93/248        | 37/262/396  |
| rs2239800  | 6   | 2  | 1  | 0/29/317        | 5/140/582   |
| rs2239804  | 6   | 1  | 2  | 29/194/123      | 184/371/171 |
| rs2242660  | 6   | 1  | 2  | 80/186/80       | 85/316/299  |
| rs2246618  | 6   | 1  | 2  | 82/156/108      | 69/258/356  |
| rs2248617  | 6   | 1  | 2  | 97/158/91       | 89/305/333  |
| rs2251396  | 6   | 1  | 2  | 54/178/114      | 55/283/389  |
| rs2253907  | 6   | 2  | 1  | 51/160/135      | 203/342/175 |
| rs2254556  | 6   | 1  | 2  | 2/56/288        | 21/191/515  |
| rs2256965  | 6   | 1  | 2  | 31/153/162      | 127/368/231 |
| rs2269127  | 21  | 1  | 2  | 60/159/100      | 16/168/542  |
| rs2294884  | 6   | 2  | 1  | 2/62/282        | 18/205/504  |

| SNP       | CHR | A1 | A2 | GENOTYPE COUNTS |             |
|-----------|-----|----|----|-----------------|-------------|
|           |     |    |    | Affected        | Unaffected  |
| rs2301271 | 6   | 1  | 2  | 113/173/60      | 116/347/264 |
| rs2358994 | 1   | 1  | 2  | 30/120/196      | 13/206/508  |
| rs2395150 | 6   | 2  | 1  | 10/128/208      | 132/351/244 |
| rs2395157 | 6   | 2  | 1  | 56/210/78       | 60/285/380  |
| rs2395162 | 6   | 1  | 2  | 9/156/180       | 12/192/520  |
| rs2395163 | 6   | 2  | 1  | 44/222/80       | 27/239/461  |
| rs2395173 | 6   | 1  | 2  | 0/65/281        | 80/325/322  |
| rs2395175 | 6   | 1  | 2  | 30/208/108      | 9/187/531   |
| rs2395182 | 6   | 2  | 1  | 0/32/312        | 30/238/457  |
| rs2395185 | 6   | 1  | 2  | 67/226/53       | 77/314/334  |
| rs2395488 | 6   | 2  | 1  | 97/158/91       | 89/302/333  |
| rs241404  | 6   | 2  | 1  | 105/170/71      | 131/367/229 |
| rs241407  | 6   | 1  | 2  | 11/111/224      | 3/136/588   |
| rs241409  | 6   | 2  | 1  | 11/110/225      | 3/137/587   |
| rs241424  | 6   | 1  | 2  | 110/181/55      | 156/348/223 |
| rs241425  | 6   | 1  | 2  | 15/136/195      | 132/341/254 |
| rs241427  | 6   | 1  | 2  | 12/118/216      | 76/321/330  |
| rs241440  | 6   | 1  | 2  | 4/73/269        | 40/308/379  |
| rs241447  | 6   | 2  | 1  | 4/75/267        | 42/305/366  |
| rs241448  | 6   | 2  | 1  | 4/77/265        | 42/298/376  |
| rs241452  | 6   | 2  | 1  | 4/75/264        | 41/305/378  |
| rs241453  | 6   | 1  | 2  | 4/74/267        | 41/308/378  |
| rs2442749 | 6   | 2  | 1  | 60/152/134      | 52/291/384  |
| rs2462957 | 17  | 2  | 1  | 112/138/88      | 127/359/241 |
| rs2476601 | 1   | 1  | 2  | 23/97/226       | 2/136/589   |
| rs2516049 | 6   | 2  | 1  | 57/226/63       | 78/303/346  |
| rs2516390 | 6   | 2  | 1  | 18/147/181      | 115/356/256 |
| rs2516398 | 6   | 2  | 1  | 10/108/228      | 68/318/328  |
| rs2516400 | 6   | 1  | 2  | 82/157/107      | 71/296/353  |
| rs2516415 | 6   | 1  | 2  | 83/160/103      | 78/294/346  |
| rs2516424 | 6   | 2  | 1  | 97/158/91       | 89/295/332  |
| rs2523454 | 6   | 1  | 2  | 54/177/115      | 57/282/388  |
| rs2523898 | 6   | 1  | 2  | 56/157/130      | 179/375/165 |
| rs2524279 | 6   | 2  | 1  | 4/66/276        | 3/60/663    |
| rs2596472 | 6   | 2  | 1  | 11/84/251       | 56/269/379  |
| rs2596560 | 6   | 2  | 1  | 44/156/145      | 33/237/454  |
| rs2621373 | 6   | 2  | 1  | 10/104/232      | 66/323/338  |
| rs2647050 | 6   | 2  | 1  | 20/97/229       | 109/353/265 |
| rs2717453 | 12  | 2  | 1  | 1/5/304         | 5/81/641    |
| rs2734583 | 6   | 2  | 1  | 14/115/217      | 11/134/582  |
| rs2765283 | 1   | 1  | 2  | 77/131/124      | 9/106/611   |
| rs2797409 | 1   | 2  | 1  | 53/133/160      | 36/271/420  |
| rs2844484 | 6   | 1  | 2  | 18/147/181      | 115/355/255 |
| rs2844494 | 6   | 2  | 1  | 10/109/227      | 68/330/322  |

| SNP       | CHR | A1 | A2 | GENOTYPE COUNTS |             |
|-----------|-----|----|----|-----------------|-------------|
|           |     |    |    | Affected        | Unaffected  |
| rs2844533 | 6   | 2  | 1  | 8/90/248        | 53/259/415  |
| rs2844697 | 6   | 1  | 2  | 87/164/95       | 100/311/316 |
| rs285019  | 16  | 2  | 1  | 100/166/67      | 123/358/242 |
| rs2855812 | 6   | 1  | 2  | 58/152/136      | 36/243/448  |
| rs2856705 | 6   | 1  | 2  | 0/31/315        | 14/137/575  |
| rs2856718 | 6   | 1  | 2  | 20/97/229       | 109/351/265 |
| rs2857106 | 6   | 2  | 1  | 2/59/285        | 19/239/468  |
| rs2857596 | 6   | 2  | 1  | 5/71/246        | 45/246/423  |
| rs2858308 | 6   | 1  | 2  | 0/31/315        | 14/137/575  |
| rs2858331 | 6   | 2  | 1  | 11/106/229      | 134/358/235 |
| rs2858870 | 6   | 2  | 1  | 0/31/315        | 18/163/543  |
| rs2905722 | 6   | 1  | 2  | 1/42/303        | 12/171/544  |
| rs3093993 | 6   | 2  | 1  | 7/93/246        | 28/279/420  |
| rs3095227 | 6   | 1  | 2  | 7/93/246        | 28/276/420  |
| rs3099844 | 6   | 1  | 2  | 12/122/212      | 10/137/578  |
| rs3101942 | 6   | 2  | 1  | 16/133/197      | 110/338/274 |
| rs3104404 | 6   | 1  | 2  | 2/57/286        | 31/258/438  |
| rs3104405 | 6   | 2  | 1  | 11/106/228      | 71/292/364  |
| rs3115573 | 6   | 2  | 1  | 86/204/56       | 142/367/218 |
| rs3115663 | 6   | 2  | 1  | 24/153/169      | 22/204/501  |
| rs3117098 | 6   | 2  | 1  | 8/90/248        | 75/313/339  |
| rs3117583 | 6   | 2  | 1  | 24/153/168      | 22/204/501  |
| rs3129860 | 6   | 1  | 2  | 0/4/342         | 17/161/549  |
| rs3129871 | 6   | 1  | 2  | 0/71/275        | 93/337/297  |
| rs3129882 | 6   | 2  | 1  | 13/120/213      | 136/370/221 |
| rs3129934 | 6   | 1  | 2  | 1/21/324        | 22/206/498  |
| rs3129941 | 6   | 1  | 2  | 1/41/304        | 44/263/418  |
| rs3129962 | 6   | 1  | 2  | 7/122/208       | 8/110/595   |
| rs3129963 | 6   | 2  | 1  | 10/156/180      | 15/204/506  |
| rs3130050 | 6   | 2  | 1  | 1/29/316        | 11/173/543  |
| rs3130055 | 6   | 2  | 1  | 9/88/249        | 44/271/412  |
| rs3130315 | 6   | 1  | 2  | 86/204/56       | 142/367/218 |
| rs3130544 | 6   | 1  | 2  | 12/117/217      | 10/145/572  |
| rs3130617 | 6   | 2  | 1  | 3/69/274        | 46/267/411  |
| rs3130618 | 6   | 1  | 2  | 24/153/169      | 23/203/501  |
| rs3130637 | 6   | 1  | 2  | 7/93/246        | 28/279/420  |
| rs3130931 | 6   | 1  | 2  | 15/107/224      | 65/290/372  |
| rs3131063 | 6   | 1  | 2  | 102/174/70      | 135/346/246 |
| rs3131296 | 6   | 1  | 2  | 10/133/203      | 14/155/547  |
| rs3131379 | 6   | 1  | 2  | 10/123/213      | 7/131/587   |
| rs3132131 | 6   | 1  | 2  | 13/113/220      | 73/297/357  |
| rs3132486 | 6   | 2  | 1  | 49/153/144      | 188/332/156 |
| rs3132946 | 6   | 1  | 2  | 0/20/326        | 16/154/557  |
| rs3134603 | 6   | 1  | 2  | 0/22/324        | 16/159/545  |

| SNP       | CHR | A1 | A2 | GENOTYPE COUNTS |             |
|-----------|-----|----|----|-----------------|-------------|
|           |     |    |    | Affected        | Unaffected  |
| rs3134792 | 6   | 2  | 1  | 11/113/211      | 1/134/571   |
| rs3134942 | 6   | 1  | 2  | 10/127/203      | 16/145/549  |
| rs3134943 | 6   | 1  | 2  | 0/22/324        | 17/164/543  |
| rs3134954 | 6   | 2  | 1  | 0/19/327        | 18/168/541  |
| rs3135338 | 6   | 2  | 1  | 0/64/281        | 80/299/322  |
| rs3135353 | 6   | 1  | 2  | 8/152/186       | 11/160/556  |
| rs329312  | 5   | 2  | 1  | 63/133/120      | 37/263/427  |
| rs3738894 | 2   | 1  | 2  | 0/27/305        | 0/4/723     |
| rs3763309 | 6   | 1  | 2  | 46/217/83       | 30/242/455  |
| rs3763312 | 6   | 1  | 2  | 46/217/83       | 30/237/455  |
| rs3763313 | 6   | 2  | 1  | 4/62/280        | 28/217/482  |
| rs3763349 | 6   | 1  | 2  | 39/158/149      | 148/369/210 |
| rs377763  | 6   | 1  | 2  | 23/166/157      | 37/241/449  |
| rs3779312 | 7   | 1  | 2  | 56/104/179      | 24/228/475  |
| rs3806156 | 6   | 1  | 2  | 80/197/69       | 99/330/298  |
| rs3817963 | 6   | 2  | 1  | 58/210/78       | 65/291/371  |
| rs3819715 | 6   | 1  | 2  | 20/132/194      | 83/356/288  |
| rs3830041 | 6   | 1  | 2  | 0/17/329        | 3/141/582   |
| rs3892710 | 6   | 1  | 2  | 27/175/144      | 17/200/510  |
| rs389884  | 6   | 2  | 1  | 10/122/214      | 9/128/590   |
| rs3916765 | 6   | 1  | 2  | 23/187/136      | 7/139/581   |
| rs3957148 | 6   | 2  | 1  | 24/211/110      | 3/132/592   |
| rs405875  | 6   | 2  | 1  | 89/201/56       | 143/367/217 |
| rs434841  | 6   | 1  | 2  | 86/152/108      | 66/285/367  |
| rs4713391 | 6   | 2  | 1  | 12/119/215      | 13/143/571  |
| rs4758868 | 12  | 1  | 2  | 66/130/130      | 195/371/161 |
| rs477515  | 6   | 1  | 2  | 57/226/63       | 78/302/346  |
| rs4814335 | 20  | 1  | 2  | 116/86/139      | 22/198/494  |
| rs4839335 | 1   | 2  | 1  | 51/135/159      | 37/273/417  |
| rs485774  | 6   | 2  | 1  | 90/199/52       | 117/353/254 |
| rs4862110 | 4   | 2  | 1  | 72/167/94       | 24/224/478  |
| rs4891291 | 18  | 1  | 2  | 32/121/183      | 130/356/241 |
| rs4943552 | 13  | 2  | 1  | 147/152/39      | 120/361/242 |
| rs4957798 | 5   | 1  | 2  | 69/169/96       | 31/239/457  |
| rs5000634 | 6   | 2  | 1  | 90/208/48       | 113/355/257 |
| rs532098  | 6   | 1  | 2  | 101/200/45      | 143/353/230 |
| rs547077  | 6   | 2  | 1  | 95/201/50       | 118/355/254 |
| rs547261  | 6   | 1  | 2  | 93/201/52       | 119/348/255 |
| rs558702  | 6   | 1  | 2  | 10/123/213      | 7/131/589   |
| rs6457617 | 6   | 2  | 1  | 29/205/112      | 169/361/192 |
| rs660895  | 6   | 2  | 1  | 53/224/69       | 21/229/477  |
| rs6665194 | 1   | 1  | 2  | 107/155/84      | 114/361/251 |
| rs666619  | 6   | 2  | 1  | 86/186/73       | 100/371/220 |
| rs6901084 | 6   | 1  | 2  | 38/152/156      | 152/369/206 |



| SNP       | CHR | A1 | A2 | GENOTYPE COUNTS |             |
|-----------|-----|----|----|-----------------|-------------|
|           |     |    |    | Affected        | Unaffected  |
| rs6903130 | 6   | 1  | 2  | 50/167/129      | 203/359/163 |
| rs6903608 | 6   | 2  | 1  | 5/78/263        | 74/326/325  |
| rs6906662 | 6   | 1  | 2  | 0/8/338         | 0/89/638    |
| rs6910071 | 6   | 2  | 1  | 36/198/112      | 20/220/487  |
| rs6910985 | 6   | 1  | 2  | 68/187/91       | 83/352/291  |
| rs6912002 | 6   | 2  | 1  | 83/160/103      | 88/306/311  |
| rs6924102 | 6   | 2  | 1  | 107/179/60      | 142/377/208 |
| rs707928  | 6   | 2  | 1  | 61/193/92       | 71/337/318  |
| rs7100025 | 10  | 2  | 1  | 123/153/39      | 90/337/298  |
| rs719654  | 6   | 1  | 2  | 4/83/259        | 36/251/440  |
| rs721394  | 6   | 1  | 2  | 5/66/275        | 26/222/479  |
| rs7267722 | 20  | 2  | 1  | 291/42/9        | 16/186/525  |
| rs7383287 | 6   | 2  | 1  | 32/151/163      | 37/236/454  |
| rs7453920 | 6   | 1  | 2  | 113/172/61      | 116/345/264 |
| rs7503953 | 17  | 1  | 2  | 95/149/81       | 12/182/533  |
| rs7529353 | 1   | 1  | 2  | 52/130/164      | 33/264/430  |
| rs7630157 | 3   | 2  | 1  | 54/21/263       | 0/21/706    |
| rs7636581 | 3   | 1  | 2  | 26/90/218       | 7/137/583   |
| rs7679475 | 4   | 1  | 2  | 87/166/92       | 96/347/284  |
| rs7726659 | 5   | 2  | 1  | 20/12/308       | 0/21/706    |
| rs7745656 | 6   | 1  | 2  | 8/71/267        | 74/309/343  |
| rs7750641 | 6   | 1  | 2  | 12/119/215      | 8/146/569   |
| rs7753935 | 6   | 1  | 2  | 3/50/293        | 24/228/475  |
| rs7755596 | 6   | 2  | 1  | 27/184/130      | 36/228/455  |
| rs7756516 | 6   | 1  | 2  | 46/159/141      | 195/361/171 |
| rs7762279 | 6   | 2  | 1  | 5/118/223       | 9/111/607   |
| rs7765810 | 6   | 1  | 2  | 6/63/277        | 36/250/440  |
| rs7767167 | 6   | 2  | 1  | 0/27/319        | 10/151/566  |
| rs7773694 | 6   | 1  | 2  | 27/190/129      | 33/238/456  |
| rs7774434 | 6   | 2  | 1  | 67/220/59       | 107/330/283 |
| rs7775397 | 6   | 2  | 1  | 7/129/210       | 10/120/593  |
| rs7897675 | 10  | 2  | 1  | 0/3/311         | 4/94/629    |
| rs7943716 | 11  | 1  | 2  | 20/107/201      | 111/347/269 |
| rs7970177 | 12  | 1  | 2  | 27/73/237       | 9/102/616   |
| rs805294  | 6   | 2  | 1  | 64/195/87       | 86/342/299  |
| rs805303  | 6   | 1  | 2  | 81/181/84       | 81/343/302  |
| rs887464  | 6   | 1  | 2  | 104/166/76      | 115/331/281 |
| rs910049  | 6   | 1  | 2  | 1/45/300        | 44/265/416  |
| rs9257802 | 6   | 1  | 2  | 22/141/183      | 24/210/488  |
| rs926070  | 6   | 2  | 1  | 3/89/254        | 79/313/335  |
| rs9267649 | 6   | 1  | 2  | 0/30/316        | 15/219/493  |
| rs9267658 | 6   | 1  | 2  | 0/24/322        | 12/163/552  |
| rs9267992 | 6   | 2  | 1  | 0/13/333        | 16/166/545  |
| rs9268005 | 6   | 2  | 1  | 4/88/254        | 78/299/333  |

| SNP       | CHR | A1 | A2 | GENOTYPE COUNTS |             |
|-----------|-----|----|----|-----------------|-------------|
|           |     |    |    | Affected        | Unaffected  |
| rs9268132 | 6   | 2  | 1  | 93/201/52       | 117/351/254 |
| rs9268368 | 6   | 2  | 1  | 93/201/52       | 118/354/255 |
| rs9268384 | 6   | 2  | 1  | 93/200/52       | 118/352/254 |
| rs9268528 | 6   | 2  | 1  | 95/214/35       | 108/355/264 |
| rs9268530 | 6   | 2  | 1  | 9/157/180       | 12/192/520  |
| rs9268542 | 6   | 2  | 1  | 95/217/34       | 111/356/260 |
| rs9268615 | 6   | 1  | 2  | 101/212/33      | 110/363/254 |
| rs9271366 | 6   | 2  | 1  | 0/3/343         | 16/164/547  |
| rs9275141 | 6   | 1  | 2  | 39/195/112      | 179/345/197 |
| rs9275184 | 6   | 2  | 1  | 67/170/109      | 10/113/591  |
| rs9275224 | 6   | 1  | 2  | 28/205/113      | 169/363/195 |
| rs9275312 | 6   | 2  | 1  | 38/208/100      | 10/161/556  |
| rs9275328 | 6   | 1  | 2  | 38/206/99       | 10/159/556  |
| rs9275374 | 6   | 1  | 2  | 55/215/76       | 40/269/418  |
| rs9275383 | 6   | 1  | 2  | 21/203/108      | 3/132/589   |
| rs9275390 | 6   | 2  | 1  | 55/213/75       | 40/269/418  |
| rs9275393 | 6   | 1  | 2  | 55/215/76       | 40/269/418  |
| rs9275406 | 6   | 1  | 2  | 55/215/76       | 40/267/418  |
| rs9275407 | 6   | 1  | 2  | 55/215/76       | 40/269/416  |
| rs9275418 | 6   | 2  | 1  | 55/215/76       | 40/269/418  |
| rs9275424 | 6   | 2  | 1  | 55/216/73       | 40/269/418  |
| rs9275425 | 6   | 1  | 2  | 55/215/76       | 40/268/418  |
| rs9275427 | 6   | 1  | 2  | 55/215/76       | 40/269/417  |
| rs9275428 | 6   | 2  | 1  | 55/215/76       | 40/269/417  |
| rs9275439 | 6   | 2  | 1  | 55/215/75       | 40/269/418  |
| rs9275595 | 6   | 2  | 1  | 42/219/85       | 27/251/448  |
| rs9275602 | 6   | 1  | 2  | 13/156/177      | 20/174/525  |
| rs9276162 | 6   | 2  | 1  | 28/190/127      | 33/244/449  |
| rs9276726 | 6   | 2  | 1  | 81/162/103      | 83/321/323  |
| rs9276734 | 6   | 1  | 2  | 83/160/103      | 88/321/312  |
| rs9276831 | 6   | 2  | 1  | 3/42/300        | 20/188/514  |
| rs928815  | 6   | 1  | 2  | 18/147/181      | 115/356/256 |
| rs9296685 | 6   | 2  | 1  | 60/177/109      | 63/335/329  |
| rs9357152 | 6   | 2  | 1  | 10/86/250       | 47/307/370  |
| rs9357155 | 6   | 1  | 2  | 8/123/215       | 10/138/571  |
| rs9368713 | 6   | 2  | 1  | 93/201/52       | 118/353/255 |
| rs9368741 | 6   | 1  | 2  | 11/102/233      | 72/328/327  |
| rs9379858 | 6   | 2  | 1  | 54/84/200       | 9/141/577   |
| rs9391858 | 6   | 2  | 1  | 2/44/300        | 18/171/538  |
| rs9405090 | 6   | 2  | 1  | 93/201/52       | 118/354/255 |
| rs9461799 | 6   | 2  | 1  | 31/148/167      | 120/369/238 |
| rs9501239 | 6   | 2  | 1  | 3/69/274        | 1/61/659    |
| rs9784758 | 6   | 2  | 1  | 6/81/259        | 1/82/644    |
| rs9837352 | 3   | 2  | 1  | 113/26/189      | 3/45/670    |

| SNP      | CHR | A1 | A2 | GENOTYPE COUNTS |            |
|----------|-----|----|----|-----------------|------------|
|          |     |    |    | Affected        | Unaffected |
| rs991760 | 6   | 1  | 2  | 2/73/271        | 4/70/653   |

**Supplemental Table E: SNPs showing nominal association (p<0.05) in the replication set**

| SNP        | CHR | Gene     | BP          | A1 | F_A     | F_U     | A2 | CHISQ | P         | OR     |
|------------|-----|----------|-------------|----|---------|---------|----|-------|-----------|--------|
| rs3115663  | 6   | BAT2     | 31,601,843  | G  | 0.3324  | 0.1711  | A  | 35.39 | 2.69E-09  | 2.413  |
| rs2242660  | 6   | BAT2     | 31,597,753  | T  | 0.5649  | 0.3968  | C  | 27.27 | 1.77E-07  | 1.974  |
| rs6665194  | 1   | BCL2L115 | 114,417,843 | A  | 0.5162  | 0.4088  | G  | 11.18 | 0.0008262 | 1.543  |
| rs2358994  | 1   | BCL2L15  | 114,429,461 | A  | 0.2486  | 0.1471  | G  | 16.55 | 4.74E-05  | 1.919  |
| rs7529353  | 1   | BCL2L15  | 114,420,462 | A  | 0.3297  | 0.2338  | G  | 11.25 | 0.0007984 | 1.612  |
| rs1980493  | 6   | BTNL2    | 32,363,215  | G  | 0.2838  | 0.1136  | A  | 48.33 | 3.61E-12  | 3.093  |
| rs2395163  | 6   | BTNL2    | 32,387,809  | C  | 0.3919  | 0.2044  | T  | 42.68 | 6.43E-11  | 2.508  |
| rs3763312  | 6   | BTNL2    | 32,376,348  | A  | 0.3784  | 0.2191  | G  | 30.47 | 3.40E-08  | 2.169  |
| rs3117098  | 6   | BTNL2    | 32,358,513  | C  | 0.1514  | 0.3059  | T  | 30.4  | 3.51E-08  | 0.4047 |
| rs3763309  | 6   | BTNL2    | 32,375,973  | A  | 0.3784  | 0.2206  | C  | 29.84 | 4.68E-08  | 2.151  |
| rs3817963  | 6   | BTNL2    | 32,368,087  | G  | 0.3995  | 0.2971  | A  | 11.27 | 0.0007869 | 1.574  |
| rs9268528  | 6   | BTNL2    | 32,383,108  | G  | 0.5081  | 0.425   | A  | 6.676 | 0.009772  | 1.398  |
| rs2294884  | 6   | BTNL2    | 32,367,259  | C  | 0.1027  | 0.1578  | A  | 6.099 | 0.01352   | 0.6108 |
| rs1270942  | 6   | CFB      | 31,918,860  | C  | 0.2541  | 0.06471 | T  | 75.26 | 4.13E-18  | 4.923  |
| rs2844657  | 6   | DDR1     | 30,829,522  | C  | 0.2865  | 0.1368  | T  | 34.97 | 3.35E-09  | 2.534  |
| rs2844659  | 6   | DDR1     | 30,824,532  | A  | 0.2784  | 0.1368  | G  | 31.65 | 1.85E-08  | 2.435  |
| rs1264350  | 6   | DDR1     | 30,796,545  | G  | 0.2081  | 0.09763 | A  | 24.73 | 6.60E-07  | 2.429  |
| rs3095352  | 6   | DDR1     | 30,805,921  | G  | 0.3351  | 0.4574  | A  | 14.75 | 0.0001227 | 0.5981 |
| rs3130653  | 6   | DDR1     | 30,822,771  | C  | 0.3142  | 0.4279  | A  | 12.96 | 0.0003183 | 0.6125 |
| rs12198723 | 6   | DDR1     | 30,796,734  | G  | 0.1649  | 0.1088  | T  | 6.717 | 0.009551  | 1.617  |
| rs12192704 | 6   | DDR1     | 30,792,270  | A  | 0.1757  | 0.1265  | G  | 4.712 | 0.02996   | 1.472  |
| rs7679475  | 4   | GPR103   | 122,314,040 | A  | 0.4649  | 0.3574  | G  | 11.59 | 0.000664  | 1.562  |
| rs10518389 | 4   | GPR103   | 122,312,073 | G  | 0.4266  | 0.5265  | A  | 9.528 | 0.002023  | 0.669  |
| rs1513695  | 4   | GPR103   | 122,314,785 | T  | 0.4783  | 0.3897  | G  | 7.683 | 0.005575  | 1.436  |
| rs3099844  | 6   | HCP5     | 31,448,976  | A  | 0.2432  | 0.08407 | C  | 50.29 | 1.33E-12  | 3.502  |
| rs3128982  | 6   | HCP5     | 31,417,191  | G  | 0.373   | 0.2103  | A  | 32.35 | 1.29E-08  | 2.234  |
| rs2395488  | 6   | HCP5     | 31,445,909  | G  | 0.5405  | 0.3603  | A  | 31.88 | 1.64E-08  | 2.089  |
| rs2248372  | 6   | HCP5     | 31,446,466  | A  | 0.1973  | 0.3618  | G  | 30.64 | 3.10E-08  | 0.4336 |
| rs2244839  | 6   | HCP5     | 31,438,368  | A  | 0.1973  | 0.3559  | G  | 28.7  | 8.47E-08  | 0.4449 |
| rs2516440  | 6   | HCP5     | 31,440,497  | T  | 0.2703  | 0.4381  | C  | 28.64 | 8.73E-08  | 0.4751 |
| rs1055569  | 6   | HCP5     | 31,440,082  | T  | 0.2676  | 0.4324  | C  | 27.78 | 1.36E-07  | 0.4796 |
| rs2516424  | 6   | HCP5     | 31,448,315  | C  | 0.5243  | 0.3647  | T  | 25.05 | 5.60E-07  | 1.92   |
| rs2248617  | 6   | HCP5     | 31,448,533  | A  | 0.5243  | 0.3647  | G  | 25.05 | 5.60E-07  | 1.92   |
| rs2596472  | 6   | HCP5     | 31,428,967  | G  | 0.1621  | 0.2688  | A  | 15.08 | 0.0001033 | 0.5263 |
| rs2596464  | 6   | HCP5     | 31,412,961  | A  | 0.4212  | 0.5223  | G  | 9.731 | 0.001812  | 0.6657 |
| rs2227956  | 6   | HSPA1L   | 31,778,272  | C  | 0.06216 | 0.1221  | T  | 9.472 | 0.002087  | 0.4768 |
| rs886424   | 6   | IER3     | 30,782,002  | A  | 0.2189  | 0.08529 | G  | 37.25 | 1.04E-09  | 3.006  |
| rs3095340  | 6   | IER3     | 30,726,939  | G  | 0.2405  | 0.1294  | T  | 21.11 | 4.33E-06  | 2.131  |
| rs4713366  | 6   | IER3     | 30,756,361  | T  | 0.2703  | 0.4029  | C  | 18.39 | 1.80E-05  | 0.5488 |
| rs13201769 | 6   | IER3     | 30,756,066  | A  | 0.2826  | 0.413   | G  | 17.45 | 2.95E-05  | 0.56   |
| rs3131063  | 6   | IER3     | 30,763,756  | A  | 0.5514  | 0.4426  | G  | 11.34 | 0.0007576 | 1.547  |
| rs12210947 | 6   | IER3     | 30,735,105  | G  | 0.2351  | 0.3015  | A  | 5.252 | 0.02192   | 0.7123 |
| rs12190167 | 6   | IER3     | 30,766,194  | A  | 0.1595  | 0.1106  | G  | 5.12  | 0.02365   | 1.525  |
| rs1041981  | 6   | LTA      | 31,540,784  | A  | 0.4481  | 0.2956  | C  | 24.36 | 8.01E-07  | 1.935  |

| SNP        | CHR | Gene     | BP          | A1 | F_A     | F_U     | A2 | CHISQ | P         | OR     |
|------------|-----|----------|-------------|----|---------|---------|----|-------|-----------|--------|
| rs2844484  | 6   | LTA      | 31,536,224  | T  | 0.2973  | 0.4469  | C  | 22.44 | 2.17E-06  | 0.5236 |
| rs2153977  | 1   | MAGI3    | 114,080,071 | T  | 0.4135  | 0.3044  | C  | 12.66 | 0.0003737 | 1.611  |
| rs10858002 | 1   | MAGI3    | 114,082,932 | G  | 0.4162  | 0.3074  | A  | 12.55 | 0.0003953 | 1.607  |
| rs1230661  | 1   | MAGI3    | 114,185,590 | T  | 0.3135  | 0.2153  | C  | 12.3  | 0.0004519 | 1.664  |
| rs12074958 | 1   | MAGI3    | 114,095,339 | G  | 0.3351  | 0.2441  | A  | 9.93  | 0.001626  | 1.561  |
| rs10858000 | 1   | MAGI3    | 114,075,796 | T  | 0.327   | 0.2382  | C  | 9.595 | 0.001951  | 1.554  |
| rs4839335  | 1   | MAGI3    | 114,233,871 | G  | 0.3378  | 0.2485  | A  | 9.48  | 0.002077  | 1.543  |
| rs12035317 | 1   | MAGI3    | 114,096,097 | G  | 0.3288  | 0.2456  | T  | 8.297 | 0.003971  | 1.505  |
| rs2251396  | 6   | MICA     | 31,364,707  | T  | 0.4459  | 0.2176  | C  | 59.69 | 1.11E-14  | 2.893  |
| rs2523454  | 6   | MICA     | 31,367,865  | T  | 0.4541  | 0.2396  | C  | 50.8  | 1.02E-12  | 2.64   |
| rs2256175  | 6   | MICA     | 31,380,449  | G  | 0.6081  | 0.4147  | A  | 35.89 | 2.08E-09  | 2.19   |
| rs2844513  | 6   | MICA     | 31,388,214  | T  | 0.3676  | 0.5397  | C  | 28.45 | 9.61E-08  | 0.4957 |
| rs2523467  | 6   | MICA     | 31,362,930  | A  | 0.273   | 0.4368  | G  | 27.31 | 1.73E-07  | 0.4842 |
| rs2442749  | 6   | MICA     | 31,352,040  | G  | 0.4459  | 0.2885  | A  | 26.27 | 2.96E-07  | 1.985  |
| rs2596542  | 6   | MICA     | 31,366,595  | A  | 0.2811  | 0.4353  | G  | 24.16 | 8.85E-07  | 0.5072 |
| rs2844529  | 6   | MICA     | 31,353,593  | T  | 0.2838  | 0.4353  | C  | 23.3  | 1.38E-06  | 0.514  |
| rs2428486  | 6   | MICA     | 31,354,104  | G  | 0.2946  | 0.4353  | A  | 20.02 | 7.66E-06  | 0.5418 |
| rs2524279  | 6   | MICA     | 31,392,906  | C  | 0.1141  | 0.05588 | T  | 11.49 | 0.0006998 | 2.177  |
| rs2844533  | 6   | MICA     | 31,350,802  | C  | 0.3108  | 0.2485  | T  | 4.711 | 0.02998   | 1.364  |
| rs2857595  | 6   | NCR3     | 31,568,469  | T  | 0.5324  | 0.2345  | C  | 94.72 | 2.20E-22  | 3.717  |
| rs2857596  | 6   | NCR3     | 31,567,422  | C  | 0.1603  | 0.2294  | A  | 6.989 | 0.008202  | 0.6414 |
| rs2071591  | 6   | NFKBIL1  | 31,515,799  | T  | 0.4405  | 0.2935  | C  | 22.89 | 1.72E-06  | 1.895  |
| rs928815   | 6   | NFKBIL1  | 31,531,215  | A  | 0.2973  | 0.4471  | C  | 22.5  | 2.10E-06  | 0.5233 |
| rs2516390  | 6   | NFKBIL1  | 31,529,883  | G  | 0.3027  | 0.4471  | A  | 20.87 | 4.91E-06  | 0.5369 |
| rs3131296  | 6   | NOTCH4   | 32,172,993  | A  | 0.273   | 0.1015  | G  | 51.94 | 5.72E-13  | 3.325  |
| rs9268005  | 6   | NOTCH4   | 32,224,388  | C  | 0.1071  | 0.295   | A  | 47.28 | 6.16E-12  | 0.2868 |
| rs434841   | 6   | NOTCH4   | 32,191,041  | A  | 0.4892  | 0.3118  | G  | 32.21 | 1.39E-08  | 2.114  |
| rs3130299  | 6   | NOTCH4   | 32,203,537  | G  | 0.1757  | 0.3132  | A  | 23.29 | 1.39E-06  | 0.4673 |
| rs9267992  | 6   | NOTCH4   | 32,220,397  | G  | 0.02162 | 0.09412 | A  | 19.72 | 8.98E-06  | 0.2127 |
| rs377763   | 6   | NOTCH4   | 32,199,144  | T  | 0.3514  | 0.2242  | G  | 19.68 | 9.15E-06  | 1.874  |
| rs3132946  | 6   | NOTCH4   | 32,190,028  | A  | 0.02703 | 0.09559 | G  | 16.98 | 3.77E-05  | 0.2628 |
| rs2267644  | 6   | NOTCH4   | 32,192,560  | A  | 0.07568 | 0.03676 | G  | 7.57  | 0.005936  | 2.145  |
| rs3134798  | 6   | NOTCH4   | 32,184,705  | C  | 0.1432  | 0.1985  | T  | 4.983 | 0.0256    | 0.675  |
| rs1111695  | 1   | PHTF1    | 114,243,899 | G  | 0.4703  | 0.3824  | T  | 7.638 | 0.005715  | 1.434  |
| rs6924102  | 6   | PSMB8    | 32,811,383  | A  | 0.3838  | 0.5603  | G  | 29.86 | 4.64E-08  | 0.4888 |
| rs2071543  | 6   | PSMB8    | 32,811,629  | A  | 0.2081  | 0.1059  | C  | 20.56 | 5.77E-06  | 2.219  |
| rs9357155  | 6   | PSMB8    | 32,809,848  | A  | 0.1946  | 0.09882 | G  | 19.09 | 1.25E-05  | 2.203  |
| rs3763349  | 6   | PSMB8    | 32,808,232  | T  | 0.3216  | 0.4441  | C  | 14.97 | 0.0001093 | 0.5934 |
| rs3130564  | 6   | PSORS1C1 | 31,101,674  | T  | 0.3054  | 0.1397  | C  | 41.42 | 1.23E-10  | 2.708  |
| rs1265099  | 6   | PSORS1C1 | 31,105,413  | C  | 0.5324  | 0.3941  | T  | 18.58 | 1.63E-05  | 1.751  |
| rs2476601  | 1   | PTPN22   | 114,377,568 | A  | 0.1892  | 0.06029 | G  | 42.11 | 8.63E-11  | 3.637  |
| rs1217418  | 1   | PTPN22   | 114,401,231 | A  | 0.5216  | 0.4279  | G  | 8.463 | 0.003624  | 1.458  |
| rs1015166  | 6   | TAP2     | 32,798,731  | T  | 0.4892  | 0.2676  | C  | 51.99 | 5.57E-13  | 2.62   |
| rs241453   | 6   | TAP2     | 32,796,226  | T  | 0.1486  | 0.3088  | C  | 32.58 | 1.14E-08  | 0.3908 |
| rs241440   | 6   | TAP2     | 32,797,361  | A  | 0.1486  | 0.3083  | G  | 32.36 | 1.28E-08  | 0.3918 |
| rs241447   | 6   | TAP2     | 32,796,751  | G  | 0.1486  | 0.3074  | A  | 32.07 | 1.49E-08  | 0.3935 |

| SNP        | CHR | Gene   | BP         | A1 | F_A     | F_U      | A2 | CHISQ | P         | OR     |
|------------|-----|--------|------------|----|---------|----------|----|-------|-----------|--------|
| rs241425   | 6   | TAP2   | 32,804,909 | T  | 0.2514  | 0.4147   | C  | 27.85 | 1.31E-07  | 0.4738 |
| rs2857106  | 6   | TAP2   | 32,787,570 | G  | 0.08919 | 0.2103   | A  | 25.19 | 5.20E-07  | 0.3677 |
| rs2228397  | 6   | TAP2   | 32,800,224 | T  | 0.1162  | 0.2426   | G  | 24.11 | 9.09E-07  | 0.4104 |
| rs241427   | 6   | TAP2   | 32,804,414 | T  | 0.2     | 0.3426   | C  | 23.57 | 1.21E-06  | 0.4796 |
| rs3819715  | 6   | TAP2   | 32,804,219 | T  | 0.2459  | 0.3941   | G  | 23.38 | 1.33E-06  | 0.5014 |
| rs9784758  | 6   | TAP2   | 32,788,511 | C  | 0.1378  | 0.06618  | T  | 14.81 | 0.0001187 | 2.256  |
| rs10484565 | 6   | TAP2   | 32,795,032 | A  | 0.1216  | 0.075    | G  | 6.27  | 0.01228   | 1.708  |
| rs1150752  | 6   | TNXB   | 32,064,726 | G  | 0.1495  | 0.002941 | A  | 99.66 | 1.81E-23  | 59.57  |
| rs1150754  | 6   | TNXB   | 32,050,758 | A  | 0.3108  | 0.1      | G  | 74    | 7.82E-18  | 4.059  |
| rs3134954  | 6   | TNXB   | 32,071,893 | G  | 0.03243 | 0.1015   | A  | 16.04 | 6.19E-05  | 0.2968 |
| rs12153855 | 6   | TNXB   | 32,074,804 | C  | 0.06486 | 0.1195   | T  | 7.917 | 0.004898  | 0.5112 |
| rs12198173 | 6   | TNXB   | 32,026,808 | A  | 0.06216 | 0.1      | G  | 4.334 | 0.03736   | 0.5965 |
| rs2523989  | 6   | TRIM31 | 30,078,275 | A  | 0.2135  | 0.1132   | G  | 19.05 | 1.28E-05  | 2.126  |
| rs2523987  | 6   | TRIM31 | 30,079,993 | G  | 0.1919  | 0.09706  | T  | 18.99 | 1.31E-05  | 2.209  |
| rs2844795  | 6   | TRIM31 | 30,073,847 | G  | 0.5081  | 0.3765   | A  | 17.01 | 3.71E-05  | 1.711  |
| rs7753935  | 6   | TRIM31 | 30,060,783 | A  | 0.127   | 0.2271   | C  | 15.48 | 8.35E-05  | 0.4951 |
| rs7765810  | 6   | TRIM31 | 30,063,496 | A  | 0.1676  | 0.2618   | C  | 12.06 | 0.0005157 | 0.5677 |

**Supplemental Table F: Top pathway showing evidence for association with APS3v**

| <b>Ingenuity Pathway</b>                               | <b>P-value</b> |
|--------------------------------------------------------|----------------|
| Cell_Cycle                                             | 3.00E-04       |
| B_Cell_Development                                     | 8.00E-04       |
| CD40_Signaling                                         | 9.00E-04       |
| Death_Receptor_Signaling                               | 0.0028         |
| Communication_between_Innate_and_Adaptive_Immune_Cells | 0.0032         |
| IL_12_Signaling_and_Production_in_Macrophages          | 0.0045         |
| Eicosanoid_Signaling                                   | 0.0052         |
| IL_22_Signaling                                        | 0.0081         |
| IL_4_Signaling                                         | 0.0151         |
| CTLA4_Signaling_in_Cytotoxic_T_Lymphocytes             | 0.0196         |
| Cdc42_Signaling                                        | 0.0338         |
| IL_2_Signaling                                         | 0.0374         |

**Supplemental Table G: Breakdown of recruitment of subjects to the Discovery and Replication Sets**

| Set         | Patients/Controls   | Breakdown of Recruitment                                          |
|-------------|---------------------|-------------------------------------------------------------------|
| Discovery   | Patients<br>(n=346) | All recruited by the SEARCH for Diabetes In the Youth Consortium* |
|             | Controls<br>(n=727) | All obtained from the Illumina iControlDB database**              |
| Replication | Patients<br>(n=185) | HBDI: 120 ***<br>Kahaly Group (Germany): 46<br>Tomer Group: 19    |
|             | Controls<br>(n=340) | HBDI: 175<br>Tomer Group: 165                                     |

\*For a full description of the SEARCH recruitment see: Hamman RF, Bell RA, Dabelea D, D'Agostino RB, Dolan L, Imperatore G, Lawrence JM, Linder B, Marcovina S, Mayer-Davis EJ, Pihoker C, Rodriguez BL, Saydah S, SEARCH for Diabetes in Yough Study Group. The SEARCH for diabetes in the youth study: Rationale, findings, and future directions. *Diabetes Care* 2014; 37: 3336-3344.

\*\*For a description of the iControlDB database see <http://genomeinformaticsalliance.org/science/icontroldb.nlm>

\*\*\*Human Biological Data Interchange (HBDI) is part of NDRI (National Disease Registry Interchange, Philadelphia, PA) and recruits patients and controls from the entire US.
